1 **Adaptation of the *FADS* gene family in Europe: Variation across time, geography and**  
2 **subsistence**

3 Kaixiong Ye<sup>1</sup>, Feng Gao<sup>1</sup>, David Wang<sup>1</sup>, Ofer Bar-Yosef<sup>2</sup>, Alon Keinan<sup>1\*</sup>

4 <sup>1</sup> Department of Biological Statistics and Computational Biology, Cornell University, Ithaca,  
5 NY, USA

6 <sup>2</sup> Department of Anthropology, Harvard University, Cambridge, MA, USA

7 \*corresponding author: alon.keinan@cornell.edu

8 **Abstract:** The *FADS* gene family encodes rate-limiting enzymes for the biosynthesis of omega-6  
9 and omega-3 long chain polyunsaturated fatty acids (LCPUFAs), which is essential for  
10 individuals subsisting on LCPUFAs-poor diets (e.g. plant-based). Positive selection on *FADS*  
11 genes has been reported in multiple populations, but its presence and pattern in Europeans  
12 remain elusive. Here, with analyses of ancient and modern DNA, we demonstrated positive  
13 selection acted on variants centered on *FADS1* and *FADS2* both before and after the advent of  
14 farming in Europe, but adaptive alleles in these two periods are opposite. Selection signals in  
15 recent history also vary geographically, with the strongest in Southern Europe. We showed that  
16 adaptive alleles in recent farmers are associated with expression of *FADS* genes, enhanced  
17 LCPUFAs biosynthesis and reduced risk of inflammatory bowel diseases. Thus, the adaptation of  
18 *FADS* genes in Europe varies across time and geography, probably due to varying diet and  
19 subsistence.

20

21

22

23

24

25

26

27

28

29

30

31

32

33

34 Identifying genetic adaptations to local environment, including historical dietary practice, and  
35 elucidating their implications on human health and disease are of central interest in human  
36 evolutionary genomics<sup>1</sup>. The fatty acid desaturase (*FADS*) gene family consists of *FADS1*,  
37 *FADS2* and *FADS3*, which evolved by gene duplication<sup>2</sup>. *FADS1* and *FADS2* encode rate-  
38 limiting enzymes for the endogenous synthesis of omega-3 and omega-6 long-chain  
39 polyunsaturated fatty acids (LCPUFAs) from shorter-chain precursors from plants  
40 (Supplementary Fig. 1). LCPUFAs are indispensable for proper human brain development,  
41 cognitive function and immune response<sup>3,4</sup>. While omega-3 and omega-6 LCPUFAs can be  
42 consumed from animal-based diets, their endogenous synthesis is essential to compensate for  
43 their absence from plant-based diets. Adaptation (positive selection) acting on the *FADS* locus, a  
44 100 kilobase (kb) region containing all three genes (Supplementary Fig. 2), has been identified in  
45 multiple populations<sup>5-9</sup>. Our recent study showed that a 22 bp insertion-deletion polymorphism  
46 (indel, rs66698963) within *FADS2*, which is associated with *FADS1* expression<sup>10</sup>, has been  
47 adaptive in Africa, South Asia and parts of East Asia, possibly driven by local historical plant-  
48 based diets<sup>8</sup>. We further supported this hypothesis by the functional association of the adaptive  
49 insertion allele with more efficient endogenous synthesis<sup>8</sup>. In Greenlandic Inuit, who have  
50 traditionally subsisted on a LCPUFAs-rich marine diet, adaptation signals were also observed on  
51 the *FADS* locus, with adaptive alleles associated with less efficient endogenous synthesis<sup>9</sup>.

52 In Europeans, positive selection on the *FADS* locus has only been reported recently in a study  
53 based on ancient DNA (aDNA)<sup>11</sup>. Evidence of positive selection from modern DNA (mDNA) is  
54 still lacking even though most of the above studies also performed similarly-powered tests in  
55 Europeans<sup>5-8</sup>. Moreover, although there are well-established differences in the Neolithization  
56 process and in dietary patterns across Europe<sup>12-14</sup>, geographical differences of selection signals  
57 within Europe have not been investigated before. Furthermore, before the advent of farming, pre-  
58 Neolithic hunter-gatherers throughout Europe had been subsisting on animal-based diets with  
59 significant aquatic contribution<sup>15-17</sup>, in contrast to the plant-heavy diets of recent European  
60 farmers<sup>18-20</sup>. We hypothesized that these drastic differences in subsistence strategy and dietary  
61 practice before and after the Neolithic revolution within Europe exert different selection  
62 pressures on the *FADS* locus. In this study, we combined analyses on ancient and modern DNA  
63 to investigate the geographical and temporal differences of selection signals on the *FADS* locus  
64 in Europe. We further interpreted the functional significance of adaptive alleles with analysis of  
65 expression quantitative trait loci (eQTLs) and genome-wide association studies (GWAS), as well  
66 as with anthropological findings within Europe.

## 67 **Results**

### 68 **Evidence of recent positive selection in Europe from both ancient and modern DNA**

69 To systematically evaluate the presence of positive selection on the *FADS* locus in Europe, we  
70 performed an array of selection tests using both ancient and modern samples. We first generated  
71 a uniform set of variants across the locus in a variety of aDNA data sets (Supplementary Table  
72 S1) via imputation (Methods). For all these variants, we conducted an aDNA-based test for  
73 recent positive selection (Methods)<sup>11</sup>. This test includes three groups of ancient European  
74 samples and four groups of modern samples. The three ancient groups represent the three major

75 ancestry sources of most present-day Europeans: Western and Scandinavian hunter-gatherers  
76 (WSHG), early European farmers (EF), and Steppe-Ancestry pastoralists (SA)<sup>11,21-23</sup>. The four  
77 groups of modern samples were drawn from the 1000 Genomes Project (1000GP), representing  
78 Tuscans (TSI), Iberians (IBS), British (GBR) and additional northern Europeans (CEU). Each  
79 modern population has been modelled as a linear mixture of the three ancestral sources with  
80 relative proportions estimated with genome-wide single nucleotide polymorphisms (SNPs)<sup>11</sup>.  
81 The frequencies of a neutral SNP in the four modern populations are expected to be the linear  
82 combinations of its frequencies in the three ancient sources (the null hypothesis  $H_0$ ), while  
83 significant deviation from this expectation (the alternative hypothesis  $H_1$ ) serves as a signal for  
84 the presence of positive selection during recent history of Europe (not more ancient than 8500  
85 years ago)<sup>11</sup>. Our results confirmed the presence of significant selection signals on many SNPs in  
86 the *FADS* locus (Fig. 1A), including the previously identified peak SNP rs174546 ( $p = 1.04e-$   
87  $21$ )<sup>11</sup>. We observed the most significant signal in the locus for an imputed SNP, rs174594 ( $p =$   
88  $1.29e-24$ ), which was not included in the original study<sup>11</sup>. SNP rs174570, one of the top adaptive  
89 SNPs reported in Greenlandic Inuit<sup>9</sup>, also carries significant signal ( $p = 7.64e-18$ ) while indel  
90 rs66698963 has no evidence of positive selection ( $p = 3.62e-3$ , but see Supplementary Text).  
91 Overall, the entire peak of selection signals coincides with a linkage disequilibrium (LD) block  
92 (henceforth referred to as the *FADS1-FADS2* LD block) in Europeans, which extends over a long  
93 genomic region of 85 kb, covering the entirety of *FADS1* and most of the much longer *FADS2*  
94 (Supplementary Figs. 2 and 3). This suggests that the large number of SNPs showing genome-  
95 wide significant signals is likely the result of one causal variant targeted by strong selection and  
96 extensive hitchhiking of nearby SNPs.

97 We next performed several selection tests solely based on mtDNA in European populations.  
98 Considering the five European populations from 1000GP, including samples of Finns (FIN) and  
99 the four samples described above, two haplotype-based selection tests, iHS<sup>24</sup> and nSL<sup>25</sup>, revealed  
100 positive selection on the derived allele of the peak SNP from the aDNA-based test, rs174594, as  
101 well as many other SNPs in the *FADS1-FADS2* LD block (Fig. 1B, Supplementary Figs. 4 and  
102 5). The normalized nSL values are significant in all five populations and the signal exhibits a  
103 gradient of being stronger in southern Europeans and weaker in northern Europeans, as per the  
104 following order (Fig. 1B): TSI ( $p = 0.00044$ ), IBS ( $p = 0.0020$ ), CEU ( $p = 0.0039$ ), GBR ( $p =$   
105  $0.0093$ ), and FIN ( $p = 0.017$ ). The iHS value is only significant in TSI ( $p = 0.026$ ). Repeating the  
106 analysis in two whole-genome sequencing cohorts of British ancestry from the UK10K project  
107 revealed consistently significant positive selection on the derived allele (Supplementary Fig. 6).  
108 The other three variants of potential interest (rs174546, rs174570, and rs66698963, colored in  
109 Fig. 1A) exhibit no or borderline selection signals, with only rs174570 showing significant  
110 normalized nSL values in the two southernmost populations (TSI:  $p = 0.022$ ; IBS:  $p = 0.050$ , Fig.  
111 1B). Interestingly, it is the ancestral allele of rs174570 that was under positive selection, while its  
112 derived allele has been shown to be targeted by positive selection in Greenlandic Inuit<sup>9</sup>.

113 We further applied two site frequency spectrum (SFS)-based selection tests that consider  
114 frequencies of all variants in a tested region (Methods). One of these two tests, Fay and Wu's  
115  $H^{26}$ , consistently revealed a cluster of significant signals spanning a 14 kb genomic region  
116 surrounding the peak SNP rs174594 in all five 1000GP European populations ( $p < 0.05$ , Fig. 1C,

117 Supplementary Fig. 7). Similar results were observed with UK10K cohorts (Supplementary Fig.  
118 8). Local peaks of H values also surround rs174546 and rs66698963, though they do not reach  
119 significance level (Fig. 1C, Supplementary Fig. 8). In all these tests, whether significant or not,  
120 the signals are gradually stronger towards Southern populations.

121 Taken together, standard tests on mDNA (Fig. 1B and 1C) support the results based on aDNA  
122 (Fig. 1A) of recent positive selection on the *FADS* locus and, specifically, on the *FADS1-FADS2*  
123 LD block. Moreover, all mDNA- and aDNA-based tests unanimously point to the same genomic  
124 region as the peak of selection signals (Fig. 1). The mDNA results additionally reveal a South-  
125 North gradient correlating with more pronounced selection signals in the South. As these tests  
126 across 1000GP populations are of comparable power (N=91-107 individuals), these results  
127 highlight an interesting possibility of stronger positive selection in Southern compared to  
128 Northern Europe.

### 129 **Geographical differences of recent positive selection signals across Europe**

130 To further rigorously evaluate geographical differences of recent positive selection signals on the  
131 *FADS* locus across Europe, we revisited the aDNA-based selection test<sup>11</sup>. We started by  
132 decomposing the original test for four representative SNPs (Fig. 2A) and then performed a  
133 revised version of the test separately in Northern and Southern Europeans for all variants in the  
134 *FADS* locus (Fig. 2B; Methods). Our first analysis included four SNPs, three of which  
135 (rs174594, rs174546, and rs174570) are top SNPs from this and previous studies<sup>9,11</sup> and are  
136 highlighted in all our analyses, while the fourth SNP (rs4246215) is the one showing the biggest  
137 difference in the upcoming South-North comparison analysis (Fig. 2B). The indel rs66698963  
138 was not highlighted in this and all upcoming analyses because it has no significant selection  
139 signals in Europe (Fig. 1). The original aDNA-based test evaluates the frequencies of a tested  
140 allele in three ancient samples and four modern 1000GP samples under two hypotheses ( $H_0$  and  
141  $H_1$ ). Under  $H_1$ , maximum likelihood estimates (MLEs) of frequencies in all samples are  
142 constrained only by observed allele counts and thus equivalent to the direct observed frequencies  
143 (Fig. 2A; blue bars). Among the four modern samples, the observed adaptive allele frequencies  
144 for all four SNPs exhibit a South-North gradient with the highest in Tuscans and the lowest in  
145 Finns, consistent with the gradient of selection signals observed before based on mDNA (Fig. 1).  
146 Among the three ancient samples, the observed allele frequencies, equivalent to the frequencies  
147 upon admixture (Fig. 2A, orange bars for ancient groups), are always the lowest and often zero  
148 in the WSHG sample.

149 Under  $H_0$ , the MLEs of frequencies are constrained by the observed allele counts and an  
150 additional assumption that an allele's frequencies in the four modern samples are each a linear  
151 combination of its frequencies in the three ancient samples. Considering the later assumption  
152 alone, we can predict the frequencies of adaptive alleles right after admixture for each modern  
153 population. Because the admixture contribution of WSHG, as estimated genome-wide, is higher  
154 towards the North, constituting of 0%, 0%, 19.6%, and 36.2% for TSI, IBS, CEU, and GBR,  
155 respectively<sup>11</sup>, the predicted adaptive allele frequencies upon admixture for these four modern  
156 populations are usually lower in the North (Fig. 2A; orange bars in modern populations),  
157 suggesting higher starting frequencies in the South at the onset of selection. Further taking into  
158 account observed allele counts in modern populations, we obtained the MLEs of frequencies  
159 under  $H_0$  (Fig. 2A; yellow bars in modern populations). As expected, the predicted allele

160 frequencies are higher in the South. But more importantly, the differences between  $H_0$  and  $H_1$   
161 estimates in modern populations (Fig. 2A; indicated frequency differences between yellow and  
162 orange bars) are still higher in the South, suggesting more recent factors, in addition to higher  
163 starting frequencies, might contribute to the observation of stronger selection signals in the  
164 South.

165 We systematically evaluated geographical differences of selection signals for all SNPs in the  
166 *FADS* locus by applying the aDNA-based selection test separately for the two Southern and the  
167 two Northern populations (Methods). All SNPs across the *FADS1-FADS2* LD block that were  
168 significant in the combined analyses (Fig. 1A) were also significant in each of the two separate  
169 analyses, but many exhibited much stronger signals in the analysis with Southern populations  
170 (Fig. 2B; Supplementary Fig. 9). The maximum difference was found for SNP rs4246215, whose  
171  $p$  value in Southern populations is 12 orders of magnitude stronger than that in Northern  
172 populations. SNP rs174594, rs174546 and rs174570 also have signals that are several orders (7,  
173 11, and 10 respectively) of magnitude stronger in the South. A further decomposition of the  
174 selection test and comparison of maximum likelihoods under the null and alternative hypotheses  
175 between South and North revealed that a stronger deviation under the null hypothesis in the  
176 South is driving the signal (Supplementary Fig. S10). This is also manifested by the bigger  
177 differences between  $H_0$  and  $H_1$  estimates of adaptive allele frequencies in modern Southern  
178 Europeans for the four representative SNPs (Fig. 2A, indicated frequency differences between  
179 yellow and blue bars). It is noteworthy that the pattern of stronger signal in the South is observed  
180 only for some but not all SNPs, excluding the possibility of systemic bias and pointing at SNP-  
181 specific properties, likely for SNPs that are in LD with an underlying causal variant. Indeed, the  
182 most common haplotype (referred to as haplotype D; Methods) within the *FADS1-FADS2* LD  
183 block, also exhibits frequency patterns that are consistent with adaptive alleles of the four  
184 representative SNPs: higher frequencies in the South among modern European populations,  
185 while lowest frequency in WSHG among ancient groups (Fig. 2C). Hence, these results  
186 demonstrated stronger selection signals on the *FADS1-FADS2* LD block in Southern Europeans.

### 187 **Opposite selection signals in pre-Neolithic European hunter-gatherers**

188 Motivated by the very different diet of pre-Neolithic European hunter-gatherers, we set to test  
189 the action of natural selection on the *FADS* locus before the Neolithic revolution. The  
190 availability of aDNA for pre-Neolithic European hunter-gatherers over a long historic period  
191 offers this unprecedented opportunity. To this end, we started by examining the frequency  
192 trajectory of haplotype D, the candidate adaptive haplotype in recent European history after the  
193 Neolithic revolution. As noted above, its frequency increase drastically during recent European  
194 history (Fig. 2C, the contrast between orange and blue bars). In stark contrast, it shows a clear  
195 trajectory of decreasing frequency over time among pre-Neolithic hunter-gatherers<sup>27</sup> (Fig. 3A):  
196 starting from 32% in the ~30,000-year-old (yo) “Věstonice cluster”, through 21% in the ~15,000  
197 yo “El Mirón cluster”, to 13% in the ~10,000 yo “Villabruna cluster”, and to being practically  
198 absent in the ~7,500 yo WSHG group. We hypothesized that there was positive selection on  
199 alleles opposite to the recently adaptive alleles that are associated with haplotype D.

200 To search for SNPs with evidence of positive selection during the pre-Neolithic period, we  
201 considered the allele frequency time series for all SNPs around the *FADS* locus. We applied to  
202 each SNP a rigorous, recently-published Bayesian method<sup>28</sup> to infer selection coefficients from



203 time series data while taking into account the European demographic history<sup>29</sup> (Methods). The  
204 test highlighted two SNPs (rs174570 and rs2851682) within the *FADS1-FADS2* LD block  
205 carrying suggestive evidence for the presence of positive selection during the pre-Neolithic  
206 period tested, approximately 30,000-7,500 years ago (Supplementary Fig. 11). The derived  
207 alleles of rs174570 and rs2851682 have similar frequency trajectories during this period,  
208 increasing from 35.7% to 77.8% (Fig. 3B). It is noteworthy that the derived allele of rs174570  
209 has also been shown to be targeted by positive selection in modern Greenlandic Inuit<sup>9</sup>. Moreover,  
210 the ancestral alleles of rs174546 and rs174594 also experienced frequency increase from about  
211 65% to almost fixation (Fig. 3B). However, presumably due to the high starting frequencies,  
212 results from the time series test are not significant for these two SNPs. Importantly, for each of  
213 these four SNPs, the allele experiencing frequency increase is opposite to the allele associated  
214 with haplotype D, with the latter allele experiencing extreme frequency increase after the  
215 Neolithic revolution.

216 We inferred selection coefficients concurrently with allele age for the derived alleles of rs174570  
217 and rs2851682<sup>28</sup> (Methods). For rs1745470, the marginal maximum *a posteriori* (MAP)  
218 estimates of selection coefficients ( $s_1$  and  $s_2$  respectively) for heterozygote and homozygote are  
219 0.28% (95% credible interval (CI): -0.025% – 1.3%) and 0.38% (95% CI: 0.038% – 0.92%)  
220 while the joint MAP of ( $s_1$ ,  $s_2$ ) is (0.24%, 0.34%). The age of the mutation giving rise to the  
221 derived allele is estimated to be 57,380 years (95% CI: 157,690 – 41,930 years) (Fig. 3C,  
222 Supplementary Fig. 12). For the derived allele of rs2851682, the marginal MAP for  $s_1$  and  $s_2$  are  
223 0.31% (95% CI: 0.033% – 1.65%) and 0.40% (95% CI: 0.028% – 1.12%), while the joint MAP  
224 is (0.26%, 0.35%) and its allele age is 53,440 years (95% CI: 139,620 – 39,320 years) (Fig. 3D,  
225 Supplementary Fig. 13). As the observed allele frequency time series for the derived alleles of  
226 these two SNPs fall well within the 95% CI of the posterior distribution (Figs. 3C and 3D), these  
227 results support the presence of positive selection on these two alleles since their first appearance.  
228 For both SNPs,  $s_2$  is larger than  $s_1$ , suggesting there was directional selection and the presence of  
229 derived allele was always beneficial. Additionally, we identified another haplotype in the  
230 *FADS1-FADS2* LD block, referred to as haplotype M2 (Methods, Supplementary Table 2), that  
231 appears in modern Europeans at frequency of 10% but is much more common in Eskimos (Fig.  
232 4A). 99% of chromosomes carrying haplotype M2 in modern Europeans also carries the derived  
233 allele of rs174570, indicating a strong association between these two. Consistent with positive  
234 selection on the derived allele of rs174570, haplotype M2 exhibits increasing frequency over  
235 time in pre-Neolithic hunter-gatherers (Supplementary Table 2), suggesting that the causal allele  
236 is associated with this haplotype.

### 237 **The temporal and global evolutionary trajectory of *FADS* haplotypes**

238 Thus far we have revealed haplotype M2 and D in the *FADS1-FADS2* LD block as the candidate  
239 adaptive haplotype within Europe before and after the Neolithic revolution, respectively. To  
240 further reveal a more complete picture of the evolutionary trajectories of haplotypes in that long  
241 LD block, we performed more detailed analyses with global ancient and modern samples.  
242 Specifically, we conducted a haplotype network analysis (Fig. 4A, Supplementary Table 2) with  
243 450 ancient haplotypes (422 from ancient European samples included in the two previous  
244 aDNA-based selection tests and additional 28 from representative ancient samples worldwide,

245 such as Neanderthal<sup>30</sup>, Denisovan<sup>31</sup>, Ust'-Ishim<sup>32</sup>, Anzick<sup>33</sup>, and Kennewick<sup>34</sup>) and 4,358 modern  
246 haplotypes (4,314 from 1000GP and 44 from modern Eskimos). Moreover, we examined the  
247 geographical frequency distribution of the resulting haplotypes in 29 previously-defined ancient  
248 Eurasian groups<sup>11,27,35</sup> with 600 haplotypes from 300 ancient samples (Fig. 4B, Supplementary  
249 Table 3; 422 haplotypes from ancient European samples included in the two previous aDNA-  
250 based tests and additional ones from the Middle East<sup>35</sup>) and also in 27 modern groups from  
251 1000GP and modern Eskimos (Fig. 4C, Supplementary Table 4; 5,008 haplotypes from 1000GP  
252 and 44 from Eskimos).

253 The top five haplotypes in modern Europeans, designated as D, M1, M2, M3 and M4 from the  
254 most to the least common (63.4%, 15.3%, 10.2%, 4.7%, 4.3%, respectively), were all observed  
255 in aDNA and in modern Africans. They account for more than 95% of haplotypes in any extant  
256 non-African populations, but only for 42% in extant African populations and for 64% in the  
257 ancient samples (Fig. 4A, Supplementary Table 2). The difference between Africans and non-  
258 Africans is consistent with the general Out-of-Africa dispersal carrying with it only a subset of  
259 African haplotypes<sup>36</sup>. The additional difference between ancient and modern European samples  
260 is consistent with the action of positive selection as already illustrated for haplotype D and M2,  
261 which reduces haplotype diversity<sup>37</sup>. Among 450 aDNA haplotypes included in the haplotype  
262 network analysis, the most common haplotypes are M2 (22%), D (17%), and M1 (16%).

263 Haplotype D has a frequency of 32% in the oldest European hunter-gatherer group, the ~30,000  
264 yo "Věstonice cluster", and a frequency of 42% in the ~14,000 yo Epipalaeolithic Natufian  
265 hunter-gatherers in the Levant (Fig. 4B, Supplementary Table 3), suggesting that it was of  
266 relatively high frequency of ~35% in the Out-of-Africa ancestors. This number is also similar to  
267 those in modern-day African populations (35% - 44%, Fig. 4C, Supplementary Table 4). As we  
268 have shown above among pre-Neolithic European hunter-gatherers, the D frequency decreased  
269 over time such that it was essentially absent by the advent of farming, possibly as a result of  
270 positive selection on haplotype M2. In addition to its absence in WSHG, D was not observed in  
271 the three ~7,500-year-old Eastern hunter-gatherers (EHG, Fig. 4B). D was re-introduced into  
272 Europe with the arrival of farmers and Steppe-Ancestry pastoralists. Since the admixture of the  
273 three ancient groups in Europe, the frequency of D has increased dramatically as a result of  
274 positive selection, possibly driven by the dietary changes associated with farming. At the same  
275 time, globally D also experienced dramatic frequency increase in South Asia and parts of East  
276 Asia (Fig. 4C). However, D was absent in modern-day Eskimos.

277 Haplotype M2 has frequencies of 29% in the "Věstonice cluster" and of 25% in Natufian hunter-  
278 gatherers, suggesting a medium frequency of ~27% at the time of Out-of-Africa dispersal  
279 (Supplementary Table 3). However, this number is much higher than its current frequencies in  
280 present-day Africans (0% - 3%, Supplementary Table 4), which might be a result of recent  
281 positive selection on other haplotypes<sup>5,6,8</sup>. During the pre-Neolithic period, M2 increased in  
282 frequency from 29% in the "Věstonice cluster" to 56% in WSHG and 50% in EHG  
283 (Supplementary Table 3). After Neolithic revolution, the frequency of M2 decreased  
284 dramatically to 10% among all present-day Europeans. There is also a South-North frequency  
285 gradient for M2: TSI (4%), IBS (7%), CEU (9%), GBR (10%), and FIN (22%). It is noteworthy  
286 that these two trends are opposite to those of haplotype D. Globally, in addition to its low  
287 frequency in Africa, M2 has low frequency in South Asia (1% - 5%) but high frequency in  
288 southern parts East Asia (44% - 53%, Supplementary Table 4). Its frequency in Eskimos is 27%.

289 Haplotype M1 has frequencies of 11% in the “Věstonice cluster” and of 8% in Natufian hunter-  
290 gatherers, suggesting a low frequency of ~10% at the time of Out-of-Africa dispersal  
291 (Supplementary Table 3). Similar to M2, this frequency is much higher than that in present-day  
292 Africans (0% - 6%, Supplementary Table 4). In contrast to D and M2, M1 had little frequency  
293 change during the pre-Neolithic period, maintaining at ~11% from the “Věstonice cluster” to  
294 WSHG (Supplementary Table 3). It also had little frequency change over time in Europe, with a  
295 frequency of ~15% in modern Europeans. Globally, M1 has overall low frequencies (<20%)  
296 except for Eskimos and American populations (Supplementary Table 4). With a frequency of  
297 73%, it dominates the haplotypes observed in Eskimos, making it the candidate adaptive  
298 haplotype in this seafood-eating population<sup>9</sup>.

299 The global frequency patterns of representative variants within the *FADS1-FADS2* LD block  
300 (rs174570, rs66698963, rs174594, rs174546, and rs2851682; Fig. 4D, Supplementary Figs. 15-  
301 19) mostly mirror those of key haplotypes, but with discrepancies that provide insights into  
302 casual variants and allele ages. One major discrepancy was found in Africa. The derived alleles  
303 of rs174570 and rs2851682 remains almost absent in Africa (Fig. 4D, Supplementary Figs. 15  
304 and 19), consistent with their allele age estimates of ~55,000 years (Figs. 3C and 3D) and ruling  
305 out their possible involvement in the positive selection on *FADS* genes in Africa<sup>5,6,8</sup>. Considering  
306 the poor LD structure of the *FADS* locus in Africa (Supplementary Fig. 20), it is possible that  
307 selection in Africa may be on haplotypes and causal variants that are different from those in  
308 Europe.

### 309 **Functional analyses of adaptive variants**

310 Previous studies on adaptive evolution of the *FADS* locus suggested that alleles targeted by  
311 positive selection are also associated with expression levels of *FADS* genes<sup>5,6,8</sup>. To test this  
312 possibility in the context of this large-scale analysis, we considered data from the Genotype-  
313 Tissue Expression (GTEx) project<sup>38</sup>. Our results point to many SNPs on the *FADS1-FADS2* LD  
314 block being eQTLs of *FADS* genes. Out of a total of 44 tissues, these eQTLs at genome-wide  
315 significance level are associated with the expression of *FADS1*, *FADS2*, and *FADS3* in 12, 23,  
316 and 4 tissues, respectively, for a total of 27 tissues (Supplementary Figs. 21-23). Considering the  
317 peak SNP rs174594 alone, nominally significant associations with these three genes were found  
318 in 29, 28 and 4 tissues, respectively. More importantly, out of these tissues with association  
319 signals, the adaptive allele in recent European history is associated with higher expression of  
320 *FADS1*, lower expression of *FADS2* and higher expression of *FADS3* in 28, 27 and 4 tissues,  
321 respectively. The general trend that recently adaptive allele is associated with higher expression  
322 of *FADS1* but lower expression of *FADS2* was also observed for other representative SNPs  
323 (rs174546, rs174570, and rs2851682) in the *FADS1-FADS2* LD block.

324 Genome-wide association studies (GWAS) have revealed 178 association signals with 44  
325 different traits in the 85 kb *FADS1-FADS2* LD block, as recorded in the GWAS catalog  
326 (Supplementary Tables 5-9)<sup>39</sup>. All effects reported in the following are based on GWAS  
327 conducted with individuals of European ancestry, while some are also replicated in other ethnic  
328 groups. Dissecting different associations, (1) the most prominent group of associated traits are  
329 polyunsaturated fatty acids (PUFAs, Supplementary Fig. 1), including LCPUFAs and their  
330 shorter chain precursors. Alleles on haplotype D are associated with higher levels of arachidonic



331 acid (20:4n-6, AA)<sup>40-42</sup>, adrenic acid (22:4n-6, AdrA)<sup>40,42-44</sup>, eicosapentaenoic acid (20:5n-3,  
332 EPA)<sup>42,45</sup> and docosapentaenoic acid (22:5n-3, DPA)<sup>42,43,45</sup>, but with lower levels of dihomo-  
333 gamma-linolenic acid (20:3n-6, DGLA)<sup>40-43</sup>, all of which suggest increased activity of delta-5  
334 desaturase encoded by *FADS1*<sup>42,46</sup>. This is consistent with the association of recently adaptive  
335 alleles with higher *FADS1* expression. Surprisingly, alleles on haplotype D are associated with  
336 higher levels of gamma-linolenic acid (18:3n-6, GLA)<sup>40,41,43</sup> and stearidonic acid (18:4n-3,  
337 SDA)<sup>42</sup>, but with lower levels of linoleic acid (18:2n-6, LA)<sup>40,41,43,47</sup> and alpha- linolenic acid  
338 (18:3n-3, ALA)<sup>41,43,45</sup>, suggesting increased activity of delta-6 desaturase encoded by *FADS2*<sup>41</sup>.  
339 However, the above eQTL analysis suggested that adaptive alleles tend to be associated with  
340 lower *FADS2* expression. Some of these association signals have been replicated across  
341 Europeans<sup>40,42-47</sup>, Africans<sup>45</sup>, East Asians<sup>41,45</sup>, and Hispanic/Latino<sup>45</sup>. (2) Besides PUFAs,  
342 recently adaptive alleles on haplotype D are associated with decreased cis/trans-18:2 fatty  
343 acids<sup>48</sup>, which in turn is associated with lower risks for systemic inflammation and cardiac  
344 death<sup>48</sup>. Consistently, adaptive alleles are also associated with decreased resting heart rate<sup>49,50</sup>,  
345 which reduces risks of cardiovascular disease and mortality. (3) With regards to other lipid  
346 levels, adaptive alleles have been associated with higher levels of high-density lipoprotein  
347 cholesterol (HDL)<sup>51-56</sup>, low-density lipoprotein cholesterol (LDL)<sup>51-53,57</sup> and total cholesterol<sup>51-53</sup>,  
348 but with lower levels of triglycerides<sup>51,52,55,56</sup>. (4) In terms of direct association with disease risk,  
349 adaptive alleles are associated with lower risk for inflammatory bowel diseases (IBD), both  
350 Crohn's disease<sup>58-60</sup> and ulcerative colitis<sup>60</sup>.

351 Going beyond known associations from the GWAS catalog, we analyzed data from the two  
352 sequencing cohorts of the UK10K study. Focusing on the peak SNP rs174594, we confirmed the  
353 association of the recently adaptive allele with higher levels of TC, LDL, and HDL. We further  
354 revealed that its adaptive allele is associated with higher levels of additional lipids, Apo A1 and  
355 Apo B (Supplementary Fig. 24). Taken together, adaptive alleles in the *FADS1-FADS2* LD  
356 block, beyond their direct association with fatty acid levels, are associated with factors that are  
357 mostly protective against inflammatory and cardiovascular diseases, and indeed also show direct  
358 association with decreased risk of a type of inflammatory autoimmune diseases.

## 359 Discussion

360 **Evidence for positive selection on *FADS* genes in Europe.** For the first time, we revealed that  
361 patterns of positive selection on *FADS* genes within Europe vary geographically, between the  
362 North and the South, and temporally, before and after the Neolithic revolution. Positive selection  
363 on *FADS* genes within Europe was initially reported in a recent aDNA-based study<sup>11</sup>. Here, we  
364 repeated the aDNA-based analysis with much higher density of variants and confirmed the  
365 presence of positive selection. Moreover, we strengthened this discovery by providing  
366 independent evidence based on mDNA analyses. Both aDNA and mDNA results consistently  
367 pointed to the region surrounding SNP rs174594 as the peak of signals, suggesting the possibility  
368 of a causal variant in that region. Overall, selection signals revealed by both aDNA and mDNA  
369 analyses coincide with an 85 kb LD block covering *FADS1* and *FADS2*. Within this LD block,  
370 the most common haplotype in current Europeans, haplotype D, is the candidate adaptive  
371 haplotype. With regards to the timing of the selection event underlying these signals, because the  
372 aDNA-based analysis specifically models the frequency change from ancient to current samples,

373 the onset of selection must have occurred after the first admixture between early farmers and  
374 northwestern hunter-gatherers which was around 8,500 years ago<sup>11</sup>. One of the top adaptive  
375 SNPs reported in Greenlandic Inuit (rs174570)<sup>9</sup>, also locates in the *FADS1-FADS2* LD block and  
376 carries adaptive signals in Europeans based on our aDNA-based analysis and haplotype-based  
377 test on mDNA. Interestingly, while its derived allele is adaptive Inuit<sup>9</sup>, it is its ancestral allele  
378 that is adaptive in Europeans, suggesting the presence of opposite selection pressures, possibly  
379 because of very different diets in these two populations. The indel rs66698963, previously  
380 reported to be adaptive in Africans, South Asians, and parts of East Asians, does not carry  
381 significant adaptive signals in Europeans. However, there is a caveat that the imputation quality  
382 for this indel might not be good enough. This indel is also a copy number variation and has a  
383 very complex sequence context (Supplementary Text). 1000GP, the reference panel for  
384 imputation, consists of known genotype calling errors for this indel<sup>8</sup>. Both of our aDNA-based  
385 test and haplotype-based test revealed little signals for this indel, but the SFS-based test (Fay and  
386 Fu's H) unraveled a local peak around the indel, although not reaching genome-wide  
387 significance. Inaccurate imputation might explain this pattern because the first two tests are  
388 single-variant-based test while the third one draws information from all SNPs within a 5 kb  
389 window and thus is less affected by imputation inaccuracy of a single variant. Besides the  
390 *FADS1-FADS2* LD block, additional selection signals were detected with mDNA analyses (Figs.  
391 1B and 1C) around the beginning of *FADS3*. Detailed analyses on this region are beyond the  
392 scope of this study and will be published separately.

393 For the first time, we demonstrated geographical differences of positive selection on *FADS* genes  
394 within Europe. The possibility of geographical differences was first suggested in our mDNA  
395 analyses (nSL, iHS, and Fay and Wu's H), with the strongest signals always observed in  
396 Southern Europeans, especially Tuscans. To formally evaluate the presence of geographical  
397 differences, we used four SNPs as examples and dissected different layers of forces, either  
398 demographic or selection, contributing to their final adaptive allele frequencies in current  
399 European populations. We revealed three layers of forces. First, among the three ancient  
400 samples, adaptive alleles always have the lowest frequencies or are even absent in western and  
401 Scandinavian hunter-gatherers (Fig. 2A). This is consistent with our observation that opposite  
402 selection forces operated in pre-Neolithic European hunter-gatherers and in more recent  
403 European farmers. Second, there are differential admixture proportions of ancient sources for  
404 Northern and Southern Europeans. The contribution of hunter-gatherers is higher towards the  
405 North, while the contribution of early farmers is higher towards the South. As a result, the  
406 predicted frequencies right after admixture are already higher in the South (Fig. 2A). Third, with  
407 a null model taking into account the first two layers and also observed allele counts in modern  
408 populations, we predicted current allele frequencies under neutrality. They are still lower than  
409 observed allele frequencies, calculated directly from observed allele counts, indicating the  
410 presence of positive selection as already detected in the aDNA-based test (Fig. 1A). More  
411 importantly, the bigger differences in the two Southern European populations compared to the  
412 two Northern populations suggest still stronger selection signals in the South (Fig. 2A), which  
413 might be a result of stronger selection pressure or earlier onset of selection in Southern Europe.  
414 These detailed analyses on the four SNPs were further confirmed by a global analysis on all  
415 SNPs in the region with aDNA-based tests separately applied on Northern and Southern  
416 Europeans. As the selection signal detected by the aDNA-based only describes the period  
417 starting from the ancient admixture to present and the exact timing of ancient admixture could be  
418 different for different populations, it is possible that ancient admixture finished earlier in

419 Southern Europe and there was a longer time for the action of selection, resulting in the stronger  
420 signals we detected. The other possibility is stronger selection pressure in the South, which is  
421 consistent with the dietary differences between Southern and Northern European farmers as  
422 discussed in the next section.

423 We also unraveled a novel discovery regarding the temporal differences of positive selection  
424 signals within Europe before and after the Neolithic revolution. Haplotype D in the *FADS1-*  
425 *FADS2* LD block, the candidate adaptive haplotype during recent European history, exhibits  
426 gradual frequency decrease over time among four groups of pre-Neolithic Hunter-gatherers, from  
427 approximately 30,000-7,500 years ago. With a recently-published Bayesian method<sup>28</sup> for  
428 inferring selection coefficients from allele frequency time series data, we identified two SNPs  
429 (rs174570 and rs2851682) with evidence of positive selection during this period. The ages of the  
430 derived alleles for these two SNPs are similar, about 55,000 years, after the Out-of-Africa  
431 dispersal. This is consistent with the near absence of these two alleles in modern Africans (Fig.  
432 4D, Supplementary Figs. 15 and 19). Although the trend of increasing frequency over time was  
433 also observed for other SNPs in the region (e.g. rs174546 and rs174594), the formal test did not  
434 reveal significant signals for them. Several factors could potentially contribute to reduced power  
435 of the test, including the higher starting frequencies for some SNPs, the small sample size for  
436 each group, and the use of samples of different ages in the same group. Future studies with much  
437 bigger sample size are needed to refine the selection signal for this pre-Neolithic period.  
438 Additionally, it will be of interest in the future to explore potential geographical differences  
439 among hunter-gatherers, especially considering the dietary differences between Northern and  
440 Southern pre-Neolithic hunter-gatherers, which are discussed in the next section.

441 **Interpretation of positive selection signals in light of anthropological findings.** The dispersal  
442 of the Neolithic package into Europe that began some 8,500 years ago caused a sharp dietary  
443 shift from an animal-based diet with significant aquatic contribution to a terrestrial plant-heavy  
444 diet including dairy products<sup>15-20</sup>. Before the Neolithic revolution, consumption of aquatic food  
445 had been prominent in diets of pre-Neolithic European hunter-gatherers<sup>61</sup>. The significant role of  
446 aquatic food, either marine or freshwater, has been established in sites along the Atlantic  
447 coast<sup>17,62-64</sup>, around the Baltic sea<sup>17</sup>, and along the Danube river<sup>65</sup>. The content of LCPUFAs are  
448 usually the highest in aquatic foods, lower in animal meat and milk, and almost negligible in  
449 most plants<sup>66</sup>. Consistent with the subsistence strategy and dietary pattern in pre-Neolithic  
450 hunter-gatherers, positive selection on *FADS* genes during this period was on alleles that are  
451 associated with less efficient endogenous synthesis of LCPUFAs, possibly compensating for the  
452 high dietary input. In addition to optimal absolute levels of LCPUFAs, maintaining a balanced  
453 ratio of omega-6 to omega-3 is also critical for human health<sup>67</sup>. It is also possible that positive  
454 selection on *FADS* genes in hunter-gatherers was in response to an unbalanced omega-6 to  
455 omega-3 ratio (e.g. too much omega-3 LCPUFAs). Similar selection signals on *FADS* genes  
456 have been observed in modern Greenlandic Inuit, who subsist on a seafood diet<sup>9</sup>. Specifically,  
457 the derived allele of SNP rs174570 carries positive selection signals in both pre-Neolithic  
458 European hunter-gatherers and modern Greenlandic Inuit. More generally, haplotype M2, the  
459 candidate adaptive haplotype during the pre-Neolithic period in Europe, is also common in the  
460 modern Eskimo samples examined in our study. It is noteworthy that aquatic food was less  
461 prevalent among pre-Neolithic hunter-gatherers around the Mediterranean basin, possibly due to  
462 the low productivity of the Mediterranean Sea<sup>68-70</sup>. It would be interesting to examine the  
463 geographical differences of selection signals among different European groups of pre-Neolithic

464 hunter-gatherers. However, aDNA from pre-Neolithic hunter-gatherers is still scarce and under-  
465 represented around the Mediterranean basin, prohibiting such an analysis at present.

466 The Neolithization of Europe<sup>12,71,72</sup> started in the Southeast region around 8,500 years ago when  
467 farming and herding spread into the Aegean and the Balkans. It continued in spite of a few  
468 temporary stops into central and northern Europe following the Danube River and its tributaries,  
469 and along the Mediterranean coast. It arrived at the Italian Peninsula about 8,000 years ago and  
470 shortly after reached the Iberia by 7,500 years ago. While farming rapidly spread across the loess  
471 plains of Central Europe and reach the Paris Basin by 7,000 years ago, it took another 1,000 or  
472 more years before it spread into Britain and Northern Europe around 6,000 years ago. From that  
473 time on, European farmers relied heavily on their domesticated animals and plants. Compared to  
474 pre-Neolithic hunter-gatherers, European farmers consumed much more plants but less aquatic  
475 foods<sup>18-20,73</sup>. Consistent with the lack of LCPUFAs in plant-based diets, positive selection on  
476 *FADS* genes during recent European history has been on alleles that are associated with  
477 enhanced endogenous synthesis of LCPUFAs from plant-derived precursors (LA and ALA).  
478 Positive selection for enhanced LCPUFAs was also observed before in Africans, South Asians  
479 and some East Asians, possibly driven by the local traditional plant-based diets<sup>8</sup>.

480 Despite the overall trend of relying heavily on domesticated plants, there are geographical  
481 differences of subsistence strategies and dietary patterns among European farmers. In addition to  
482 the 2,000-year-late arrival of farming at Northern Europe, animal husbandry and the  
483 consumption of animal milk became gradually important as Neolithic farmers spread to the  
484 Northwest<sup>18,72,74-76</sup>. Moreover, similar to their pre-Neolithic predecessors, Northwestern  
485 European farmers close to the Atlantic Ocean or the Baltic Sea still consumed some marine food,  
486 more so than their Southern counterparts in the Mediterranean basin<sup>77,78</sup>. It is noteworthy that  
487 historic dairying practice in Northwestern Europe has driven the adaptive evolution of lactase  
488 persistence in Europe to reach the highest prevalence in this region<sup>75</sup>. In this study, we observed  
489 stronger positive selection signals on *FADS* genes during recent history in Southern than in  
490 Northern Europeans, even after considering the later arrival of farming and the lower starting  
491 allele frequencies in the North. The higher aquatic contribution and stronger reliance on animal  
492 meat and milk might be responsible for the weaker selection pressure in the North, although the  
493 possibilities of other environmental factors could not be ruled out.

494 **Interpretation of eQTLs and GWAS results.** Although liver is the primary site for the  
495 endogenous synthesis of LCPUFAs, the action of the pathway has been observed in a wide range  
496 of tissues<sup>79,80</sup>, including heart<sup>81</sup>, brain<sup>81-83</sup>, both white and brown adipose tissues<sup>84</sup>. Moreover,  
497 while the synthesis rate and relevant enzyme levels in liver are regulated by dietary fatty acid  
498 inputs, they are not affected in other tissues<sup>81</sup>, indicating that identifying eQTLs for *FADS* genes  
499 in the liver might need extra control for dietary inputs. Based on data from the GTEx project,  
500 eQTLs within the *FADS1-FADS2* LD block for the three *FADS* genes were identified in multiple  
501 tissues and in general recently adaptive alleles are associated with higher *FADS1* expression but  
502 lower *FADS2* expression. No genome-wide significant eQTLs for *FADS1* and *FADS2* were  
503 found in the liver, probably due to the complication of dietary inputs, which were not available to  
504 be controlled for during analysis. However, an apparent cluster of elevated association signals  
505 with *FADS1* was observed in the liver, although they do not reach genome-wide significance  
506 level (Supplementary Fig. 21). Furthermore, for the recently adaptive allele of peak SNP  
507 rs174594, the directions of association with *FADS1* and *FADS2* in the liver, although not  
508 significant, are consistent with the general trend – higher *FADS1* but lower *FADS2* expression.



509 The exact causal regulatory variants and the underlying mechanisms are still unknown, but  
510 variants disrupting the sterol response element (SRE) are among the most likely candidates<sup>2</sup>.

511 GWAS revealed several potential beneficial effects of the recently adaptive alleles: enhanced  
512 efficiency of the overall LCPUFAs synthesis, lower risks of systemic inflammation,  
513 inflammatory bowel diseases, and cardiovascular diseases. The directions of association with  
514 PUFAs along the synthesis pathway (Supplementary Fig. 1) reflect the relative efficiency of rate-  
515 limiting enzymes, delta-5 and delta-6 desaturases: enhanced delta-5 desaturase activity is  
516 expected to reduce levels of its precursors, LA and ALA, but to increase levels of its products,  
517 GLA and SDA, while similarly enhanced delta-6 desaturase activity is expected to reduce DGLA  
518 and ETA, but to increase levels of AA, Adra, EPA and DPA. While GWAS results are  
519 consistent with eQTLs analysis in revealing increased *FADS1* expression and enhanced delta-5  
520 desaturase activity, they seem contradictory for *FADS2*: recently adaptive alleles are associated  
521 with lower *FADS2* expression but enhanced delta-6 desaturase activity. There are several  
522 possible explanations. First, the *FADS2* expression level might not directly correlate with the  
523 final delta-6 desaturase level because of post-transcriptional regulation. Second, the direction of  
524 *FADS2* eQTLs might be different in the liver from other tissues. Currently, there are marginal  
525 association signals for *FADS1* in the liver but no signals for *FADS2*. Additional analysis for  
526 *FADS2* is needed in the liver with proper control for dietary inputs. Third, there may be  
527 alternative splicing in addition to expression level change. Further experiments are needed to  
528 address this discrepancy and to unravel the underlying molecular mechanisms. Besides PUFAs,  
529 GWAS also revealed an overall trend that recently adaptive alleles are protective against  
530 inflammatory conditions, especially inflammatory bowel diseases. But there are exceptions:  
531 these alleles were also found to be associated with increased risk of rheumatoid arthritis<sup>85</sup> and  
532 colorectal cancer<sup>86</sup>. Because LCPUFAs-derived signaling molecules have both pro-inflammatory  
533 and anti-inflammatory effects (Supplementary Fig. 1), elucidating the effects of these adaptive  
534 alleles on specific diseases will require case-by-case analysis with special consideration of the  
535 relative contributions of omega-6 and omega-3 LCPUFAs. The effort in understanding the  
536 clinical significance of genetic variants in *FADS* genes might also reveal additional selection  
537 pressures beyond diet acting on these genes.

## 538 **Conclusions**

539 In summary, we demonstrated that in Europe an extended LD block covering *FAD1* and *FADS2*  
540 of the *FADS* gene family has been under strong recent positive selection both before and after the  
541 Neolithic revolution. During the recent history, positive selection also varies geographically,  
542 with selection signals and adaptive allele frequencies gradually increasing from Northern  
543 towards Southern Europe. The plant-heavy diet of European farmers, with its lack of LCPUFAs,  
544 is one possible environmental factor contributing to the recent positive selection. The higher  
545 consumption of aquatic resources and animal milk among Northwestern European farmers might  
546 contribute to the weaker selection signals observed in the North. Consistently, many alleles on  
547 the recently adaptive haplotype are eQTLs that increase *FADS1* expression, thereby increasing  
548 the efficacy of LCPUFAs synthesis. Additional evidence comes from a multitude of GWAS  
549 showing recently adaptive alleles associated with enhanced LCPUFAs biosynthesis. Before the  
550 advent of farming, the recently adaptive haplotype showed dramatic decrease in frequency across  
551 pre-Neolithic hunter-gatherers. While this could have been due to negative selection affecting  
552 alleles on the haplotype, time series analysis showed that it was driven by positive selection on



553 alleles opposite to those on the recently adaptive haplotype. Considering that pre-Neolithic  
554 hunter-gatherers subsisted on animal-based diets with significant aquatic contribution, limiting  
555 the rate of endogenous LCPUFAs synthesis by decreasing *FADS1* expression might be beneficial  
556 and contributed to that ancient adaptation. This discovery of subsistence-based temporal and  
557 geographical variations of selection in Europe supports and completes the global picture of the  
558 local adaptation of *FADS* genes: positive selection on alleles enhancing LCPUFAs biosynthesis  
559 in populations traditionally subsisting on plant-based diets<sup>5,6,8</sup>, but positive selection on opposite  
560 alleles in populations subsisting on a LCPUFAs-rich marine diet<sup>9</sup>. This opposite pattern of  
561 positive selection in different dietary environment highlights the potential of matching diet to  
562 genome in the future nutritional practice. Finally, the vast number of traits associated with the  
563 adaptive region in the *FADS* genes, while raising the possibility of additional selection forces  
564 beyond diet, stresses the clinical and nutritional significance of understanding the evolutionary  
565 forces shaping the *FADS* gene family and other diet-related genes.

## 566 **Methods**

567 **Data sets.** The ancient DNA (aDNA) data set included in this study was compiled from two  
568 previous studies<sup>27,35</sup>, which in turn were assembled from many other studies<sup>11,21,22,30-34,87-96</sup>, in  
569 addition to new sequenced samples. These two data sets were downloaded from  
570 <https://reich.hms.harvard.edu/datasets> and were merged by removing overlapping samples. In  
571 total, there are 325 ancient samples included in this study (Supplementary Table 1). For the  
572 aDNA-based test for recent selection in Europe, a subset of 178 ancient samples were used and  
573 clustered into three groups as in the original study<sup>11</sup>, representing the three major ancestral  
574 sources for most present-day European populations. These three groups are: West and  
575 Scandinavian hunter-gatherers (WSHG, N=9), early European farmers (EF, N=76), and  
576 individuals of Steppe-pastoralist Ancestry (SA, N=93). Three samples in the EF group in the  
577 original study were excluded from our analysis because they are genetic outliers to this group  
578 based on additional analysis<sup>35</sup>. For aDNA-based test for ancient selection in pre-Neolithic  
579 European hunter-gatherers, a subset of 42 ancient samples were used and four groups were  
580 defined. In addition to the WSHG (N=9), the other three groups were as originally defined in a  
581 previous study<sup>27</sup>: the “Věstonice cluster”, composed of 14 pre-Last Glacial Maximum  
582 individuals from 34,000-26,000 years ago; the “El Mirón cluster”, composed of 7 post-Last  
583 Glacial Maximum individuals from 19,000-14,000 years ago; the “Villabruna cluster”, composed  
584 of 12 post-Last Glacial Maximum individuals from 14,000-7,000 years ago. There were three  
585 Western hunter-gatherers that were originally included in the “Villabruna cluster”<sup>27</sup>, but we  
586 included them in WSHG in the current study because of their similar ages in addition to genetic  
587 affinity<sup>11</sup>. In haplotype network analysis, all aDNAs included in the two aDNA-based selection  
588 tests were also included in this analysis. In addition, we included some well-known ancient  
589 samples, such as the Neanderthal, Denisovan, and Ust’-Ishim. In total, there were 225 ancient  
590 samples (450 haplotypes). For geographical frequency distribution analysis, a total of 300  
591 ancient samples were used and classified into 29 previously defined groups<sup>11,27,35</sup> based on their  
592 genetic affinity, sampling locations and estimated ages.

593 Data for the 1000 Genomes Project (1000GP, phase 3)<sup>7</sup> were downloaded from the official FTP  
594 site (<ftp://ftp.1000genomes.ebi.ac.uk/vol1/ftp/release/20130502/>). There are in total 2,504  
595 individuals from 5 continental regions and 26 global populations. There are 7 populations of  
596 African ancestry (AFR, N=661): Yoruba in Ibadan, Nigeria (YRI, N=108), Luhya in Webuye,  
597 Kenya (LWK, N=99), Gambian in Western Divisions in the Gambia (GWD, N=113), Mende in  
598 Sierra Leone (MSL, N=85), Esan in Nigeria (ESN, N=99), Americans of African Ancestry in  
599 SW USA (ASW, N=61), African Caribbeans in Barbados (ACB, N=96); 5 populations of  
600 European ancestry (EUR, N=503): Utah Residents with Northern and Western European  
601 Ancestry (CEU, N=99), Toscani in Italia (TSI, N=107), Finnish in Finland (FIN, N=99), British  
602 in England and Scotland (GBR, N=91), Iberian Population in Spain (IBS, N=107); 5 populations  
603 of East Asian ancestry (EAS, N=504): Han Chinese in Beijing, China (CHB, N=103), Japanese  
604 in Tokyo, Japan (JPT, N=104), Southern Han Chinese (CHS, N=105), Chinese Dai in  
605 Xishuangbanna, China (CDX, N=93), Kinh in Ho Chi Minh City, Vietnam (KHV, N=99); 5  
606 populations of South Asian ancestry (SAS, N=489): Gujarati Indian from Houston, Texas (GIH,  
607 N=103), Punjabi from Lahore, Pakistan (PIL, N=96), Bengali from Bangladesh (BEB, N=86),  
608 Sri Lankan Tamil from the UK (STU, N=102), Indian Telugu from the UK (ITU, N=102), and 4  
609 populations of American ancestry (AMR=347): Mexican Ancestry from Los Angeles USA  
610 (MXL, N=64), Puerto Ricans from Puerto Rico (PUR, N=104), Colombians from Medellin,  
611 Colombia (CLM, N=94), Peruvians from Lima, Peru (PEL, N=85).

612 The data set for Human Genome Diversity Project (HGDP)<sup>97</sup> was downloaded from  
613 <http://www.hagsc.org/hgdp/files.html>. There were ~650K SNPs in 939 unrelated individuals  
614 from 51 populations. The data from the Population Reference Sample (POPRES)<sup>98</sup> were  
615 retrieved from dbGaP with permission. Only 3,192 Europeans were included in our analysis. The  
616 country of origin of each sample was defined with two approaches. Firstly, a “strict consensus”  
617 approach was used: an individual’s country of origin was called if and only if all four of his/her  
618 grandparents shared the same country of origin. Secondly, a more inclusive approach was used to  
619 further include individuals that had no information about their grandparents. In this case, their  
620 countries of birth were used. Both approaches yielded similar results and only results from the  
621 inclusive approach are reported. The 22 Eskimo samples were extracted from the Human Origins  
622 dataset<sup>22</sup>.

623 The two sequencing cohorts of UK10K were obtained from European Genome-phenome  
624 Archive with permission<sup>99</sup>. These two cohorts, called ALSPAC and TwinsUK, included low-  
625 depth whole-genome sequencing data and a range of quantitative traits for 3,781 British  
626 individuals of European ancestry (N=1,927 and 1,854 for ALSPAC and TwinsUK,  
627 respectively)<sup>99</sup>.

628 **Imputation for ancient and modern DNA.** Genotype imputation was performed using Beagle  
629 4.1<sup>100</sup> separately for the data sets of aDNA, HGDP and POPRES. The 1000GP phase 3 data were  
630 used as the reference panel<sup>7</sup>. Imputation was performed for a 5-Mb region surrounding the *FADS*  
631 locus (hg19:chr11: 59,100,000-64,100,000), although most of our analysis was restricted to a 200  
632 kb region (hg19:chr11:61,500,000-61,700,000). For most of our analysis (e.g. estimated allele  
633 count or frequency for each group), genotype probabilities were taken into account without

634 setting a specific cutoff. For haplotype-based analysis (e.g. estimated haplotype frequency for  
635 each group), a cutoff of 0.8 was enforced and haplotypes were defined with missing data (if the  
636 genotype does not reach the cutoff) following the phasing information from imputation.

637 Genotype imputation for aDNA has been shown to be desirable and reliable<sup>88</sup>. We also evaluated  
638 the imputation quality for aDNA by comparing with the two modern data sets (Supplementary  
639 Fig. 25). Overall, the imputation accuracy for ungenotyped SNPs, measured with allelic  $R^2$  and  
640 dosage  $R^2$ , is comparable between aDNA and HGDP, but is higher in aDNA when compared  
641 with POPRES. Note that the sample sizes are much larger for HGDP (N=939) and POPRES  
642 (N=3,192), compared to aDNA (N=325). The comparable or even higher imputation quality in  
643 aDNA was achieved because of the higher density of genotyped SNPs in the region.

644 **Linkage disequilibrium and haplotype network analysis.** Linkage disequilibrium (LD)  
645 analysis was performed with the Haploview software (version 4.2)<sup>101</sup>. Analysis was performed  
646 on a 200-kb region (chr1 1:61,500,000-61,700,000), covering all three *FADS* genes. Variants  
647 were included in the analysis if they fulfilled the following criteria: 1) biallelic; 2) minor allele  
648 frequency (MAF) in the sample not less than 5%; 3) with rsID; 4) *p* value for Hardy-Weinberg  
649 equilibrium test larger than 0.001. Analysis was performed separately for the combined UK10K  
650 cohort and each of the five European populations in 1000G.

651 Haplotype network analysis was performed with the R software package, pegas<sup>102</sup>. To reduce the  
652 number of SNPs and thus the number of haplotypes included in the analysis, we restricted this  
653 analysis to part of the 85 kb *FADS1-FADS2* LD block, starting 5 kb downstream of *FADS1* to  
654 the end of the LD block (a 60-kb region). To further reduce the number of SNPs, in the analysis  
655 with all 1000GP European samples, we applied an iterative algorithm<sup>103</sup> to merge haplotypes that  
656 have no more than three nucleotide differences by removing the three corresponding SNPs. The  
657 algorithm stops when all remaining haplotypes are more than 3 nucleotides away. With this  
658 procedure, we were able to reduce the number of total haplotypes from 81 to 12, with the number  
659 of SNPs decreased from 88 to 34 (Supplementary Fig. 26). This set of 34 representative SNPs  
660 was used in all haplotype-based analysis in aDNA, 1000GP, HGDP and POPRES. Missing data  
661 (e.g. from a low imputation genotype probability) were included in the haplotype network  
662 analysis.

663 Of note, for the 12 haplotypes identified in 1000GP European samples, only five of them have  
664 frequency higher than 1% (Supplementary Table 2). These five haplotypes were designated as D,  
665 M1, M2, M3 and M4, from the most common to the least.

666 **Ancient DNA-based test for recent selection in Europe.** The ancient DNA-based selection test  
667 was performed as described before<sup>11</sup>. Briefly, most European populations could be modelled as a  
668 mixture of three ancient source populations at fixed proportions. The three ancient source  
669 populations are West or Scandinavian hunter-gatherers (WSHG), early European farmers (EF),  
670 and Steppe-Ancestry pastoralist (SA) (Supplementary Table 1). For modern European  
671 populations in 1000G, the ancestral proportions of these three populations estimated at genome-  
672 wide level are (0.196, 0.257, 0.547) for CEU, (0.362, 0.229, 0.409) for GBR, (0, 0.686, 0.314)  
673 for IBS, and (0, 0.645, 0.355) for TSI. FIN was not used because it does not fit this three-

674 population model<sup>11</sup>. Under neutrality, the frequencies of a SNP (e.g. reference allele) in present-  
675 day European populations are expected to be the linear combination of its frequencies in the  
676 three ancient source populations. This serves as the null hypothesis:  $p_{mod} = Cp_{anc}$ , where  
677  $p_{mod}$  is the frequencies in A modern populations (A is always 3 in our test),  $p_{anc}$  is the  
678 frequencies in B ancient source populations while C is an AxB matrix with each row  
679 representing the estimated ancestral proportions for one modern population. The alternative  
680 hypothesis is that  $p_{mod}$  is unconstrained by  $p_{anc}$ . The frequency in each population is modelled  
681 with binomial distribution:  $L(p; D) = B(X, 2N, p)$ , where X is the number of designated allele  
682 observed while N is the sample size. In ancient populations, X is the expected number of  
683 designated allele observed, taking into account uncertainty in imputation. We write  $\ell(p; D)$  for  
684 the log-likelihood. The log-likelihood for SNP frequencies in all three ancient populations and  
685 four modern populations are:  $\ell(\vec{p}; \vec{D}) = \sum_{i=1}^A \ell(p_i; D_i) + \sum_{j=1}^B \ell(p_j; D_j)$ . Under the null  
686 hypothesis, there are A parameters in the model, corresponding to the frequencies in A ancient  
687 populations. Under the alternative hypothesis, there are A+B parameters, corresponding to the  
688 frequencies in A ancient populations and B modern populations. We numerically maximized the  
689 likelihood separately under each hypothesis and evaluate the statistic (twice the difference in log-  
690 likelihood) with the null  $\chi_B^2$  distribution. Inflation was observed with this statistic in a previous  
691 genome-wide analysis and a  $\lambda = 1.38$  was used for correction in the same cases of three ancient  
692 source populations and four present-day European populations<sup>11</sup>. Following this, we applied the  
693 same factor in correcting the p values in our analysis. For genotyped SNPs previously tested,  
694 similar scales of statistical significance were observed as in the previous study (Supplementary  
695 Fig. 27). We note that for the purpose of refining the selection signal with imputed variants, only  
696 relative significance levels across variants are informative.

697 In addition to combining signals from four present-day European populations, we further  
698 performed tests separately in the two South European populations (IBS and TSI) and in the two  
699 North European populations (CEU and GBR). In these two cases, B = 2 and the null distribution  
700 is  $\chi_2^2$ . No genomic correction was performed for these two cases.

### 701 **Ancient DNA-based test for ancient selection in pre-Neolithic European hunter-gatherers.**

702 A Bayesian method<sup>28</sup> was applied to infer natural selection from allele frequency time series  
703 data. The software was downloaded from <https://github.com/Schraiber/selection>. This method  
704 models the evolutionary trajectory of an allele under a specified demographic history and  
705 estimates selection coefficients ( $s_1$  and  $s_2$ ) for heterozygote and homozygote of the allele under  
706 study. This method has two modes, with or without the simultaneous estimation of allele age  
707 (with or without “-a” in the command line). Without the estimation of allele age, this method  
708 models the frequency trajectory only between the first and last time points provided and its  
709 estimates of selection coefficients describe the selection force during this period only. With the  
710 simultaneous estimation of allele age, this method models the frequency trajectory starting from  
711 the first appearance of the allele to the last time point provided. In this case, the selection  
712 coefficients describe the selection force starting from the mutation of the allele, which therefore  
713 should be the derived allele. For demographic history, we used the model with two historic  
714 epochs of bottleneck and recent exponential growth<sup>29</sup>. However, the recent epoch of exponential



715 growth does not have an impact on our analysis because for our analysis the most recent sample,  
716 WSHG, had an age estimate of around 7500 years ago, predating the onset of exponential growth  
717 (3520 years ago, assuming 25 years per generation). Four groups of pre-Neolithic European  
718 hunter-gatherers were included in our test: the Věstonice cluster (median sample age: 30,076 yo),  
719 the El Mirón cluster (14,959 yo), the Villabruna cluster (10,059 yo) and WSHG (7,769 yo).

720 The use of allele frequency time series data in this Bayesian method makes several assumptions,  
721 including 1) all samples are from a randomly mating population with continuity of genetic  
722 ancestry; and 2) samples are drawn at different time points<sup>28</sup>. Although there was population  
723 structure among pre-Neolithic hunter-gatherers, the four groups used in our study were clustered  
724 mainly based on their genetic affinity with additional filtering based on their archaeological  
725 contexts<sup>27</sup>, therefore population structure in each group was minimized. There is also  
726 demonstrated shared genetic ancestry among these groups<sup>27</sup>. Each of the four groups includes  
727 samples of different ages and the median sample age was used to represent the sampling time of  
728 the group. This approach might introduce noise into the time series and thus reduce the power of  
729 the method, making the test conservative. Overall, our time series data do not deviate from these  
730 assumptions.

731 To identify SNPs with evidence of positive selection during the historic period covered by  
732 available ancient samples (from Věstonice to WSHG), we first ran the software for most SNPs in  
733 the *FADS* locus without the simultaneous estimation of allele age. SNPs with small frequency  
734 difference (< 5%) between the first (Věstonice) and last (WSHG) time points were not included  
735 in the analysis. For each tested SNP, the allele under analysis was the one showing increasing  
736 frequency at the last time point compared to the first. Allele frequency time series data, for each  
737 tested SNP, were provided to the software as the expected number of the allele (calculated based  
738 on genotype probability) and the sample size. Each software run generated 1,000 Markov chain  
739 Monte Carlo (MCMC) samples out of 1,000,000 MCMC simulations with a sampling frequency  
740 of every 1,000. The effective sample size of these 1,000 samples were evaluated with the R  
741 package, coda<sup>104</sup>. Only runs with effective sample size larger than 50 for four parameters (the  
742 sampling likelihood, path likelihood,  $\alpha_1$  estimate, and  $\alpha_2$  estimate) were used<sup>28</sup>. A maximum of  
743 100 runs were attempted for each SNP until a run with sufficient effective sample size was  
744 achieved. Otherwise, the SNPs were discarded in our analysis. Visual examination of the  
745 observed frequency trajectory for multiple failed SNPs revealed that none of them showed  
746 increasing frequency over time and therefore they were unlikely to be under selection. For SNPs  
747 with successful software runs, the maximum *a posteriori* (MAP) estimates and the 90% credible  
748 intervals (CI) for  $s_1$  and  $s_2$  were calculated. Suggestive evidence for positive selection was called  
749 if the 90% CI does not overlap with 0. Second, for the two candidate SNPs (rs174570 and  
750 rs2851682) identified in the unbiased global analysis, we further ran the software with the  
751 simultaneous estimation of derived allele age. The inference results were plotted with R scripts  
752 accompanying the software and additional customized scripts (available upon request).

753 **Modern DNA-based selection tests.** We performed two types of selection tests for modern  
754 DNAs: site frequency spectrum (SFS)-based and haplotype-based tests. These tests were  
755 performed separately in each of the five European populations from 1000G and each of the two  
756 cohorts from UK10K. For SFS-based tests, we calculated genetic diversity ( $\pi$ ), Tajima's  $D$ <sup>105</sup>,



757 and Fay and Wu's  $H^{26}$ , using in-house Perl scripts (available upon request). We calculated these  
758 three statistics with a sliding-window approach (window size = 5 kb and moving step = 1 kb).  
759 Statistical significance for these statistics were assessed using the genome-wide empirical  
760 distribution. Haplotype-based tests, including  $iHS^{24}$  and  $nSL^{25}$ , were calculated using software  
761 selscan (version 1.1.0a)<sup>106</sup>. Only common biallelic variants (Minor allele frequency > 5%) were  
762 included in the analysis. Genetic variants without ancestral information were further excluded.  
763 These two statistics were normalized in their respective frequency bins (1% interval) and the  
764 statistical significance of the normalized  $iHS$  and  $nSL$  were evaluated with the empirical  
765 genome-wide distribution. The haplotype bifurcation diagrams and EHH decay plots were drawn  
766 using an R package, rehh<sup>107</sup>.

767 **Geographical frequency distribution analysis.** For plots of geographical frequency  
768 distribution, the geographical map was plotted with R software package, maps ([https://CRAN.R-](https://CRAN.R-project.org/package=maps)  
769 [project.org/package=maps](https://CRAN.R-project.org/package=maps)) while the pie charts were added with the mapplots package  
770 (<https://cran.r-project.org/web/packages/mapplots/index.html>). Haplotype frequencies were  
771 calculated based on haplotype network analysis with pegas<sup>102</sup>, which groups haplotypes while  
772 taking into account missing data. SNP frequencies were either the observed frequency, if the  
773 SNP was genotyped, or the expected frequency based on genotype probability, if the SNP was  
774 imputed.

775 **Targeted association analysis for peak SNP rs174594 in UK10K.** We performed association  
776 analysis for rs174594 in two UK10K datasets – ALSPAC and TwinsUK<sup>99</sup>. For both datasets, we  
777 analyzed height, weight, BMI and lipid level related traits including total cholesterol (TC), low  
778 density lipoprotein (LDL), very low density lipoprotein (VLDL), high density lipoprotein  
779 (HDL), Apolipoprotein A-I (APOA1), Apolipoprotein B (APOB) and triglyceride (TRIG). We  
780 performed principal components analysis using smartpca from EIGENSTRAT software<sup>108</sup> with  
781 genome-wide autosomal SNPs and we added top 4 principal components as covariates for all  
782 association analysis. We also used age as a covariate for all association analysis. Sex was added  
783 as a covariate only for ALSPAC dataset since all individuals in TwinsUK dataset are female. For  
784 all lipid-related traits, we also added BMI as a covariate.

#### 785 **Data availability.**

786 Ancient DNA: <https://reich.hms.harvard.edu/datasets>

787 1000 Genomes Project: <ftp://ftp.1000genomes.ebi.ac.uk/vol1/ftp/release/20130502/>

788 Human Genome Diversity Project (HGDP): <http://www.hagsc.org/hgdp/files.html>

789 Population Reference Sample (POPRES): dbGaP Study Accession: phs000145.v4.p2

790 UK10K: [https://www.uk10k.org/data\\_access.html](https://www.uk10k.org/data_access.html)

791 **Code availability.** Most analyses were conducted with available software and packages as  
792 described in the corresponding subsections of Methods. Customized Perl and R scripts were used  
793 in performing SFS-based selection test, and for general plotting purposes. All these scripts are  
794 available upon request (Contact K.Y. at ky279@cornell.edu).

## 795 References

796

- 797 1 Fan, S., Hansen, M. E. B., Lo, Y. & Tishkoff, S. A. Going global by adapting local: A review of  
798 recent human adaptation. *Science* **354**, 54-59 (2016).
- 799 2 Nakamura, M. T. & Nara, T. Y. Structure, function, and dietary regulation of delta6, delta5, and  
800 delta9 desaturases. *Annu Rev Nutr* **24**, 345-376 (2004).
- 801 3 Raphael, W. & Sordillo, L. M. Dietary polyunsaturated fatty acids and inflammation: the role of  
802 phospholipid biosynthesis. *Int J Mol Sci* **14**, 21167-21188 (2013).
- 803 4 Bazinet, R. P. & Laye, S. Polyunsaturated fatty acids and their metabolites in brain function and  
804 disease. *Nat Rev Neurosci* **15**, 771-785 (2014).
- 805 5 Mathias, R. A. *et al.* Adaptive evolution of the FADS gene cluster within Africa. *PLoS One* **7**,  
806 e44926 (2012).
- 807 6 Ameur, A. *et al.* Genetic adaptation of fatty-acid metabolism: a human-specific haplotype  
808 increasing the biosynthesis of long-chain omega-3 and omega-6 fatty acids. *Am J Hum Genet* **90**,  
809 809-820 (2012).
- 810 7 The 1000 Genomes Project Consortium *et al.* A global reference for human genetic variation.  
811 *Nature* **526**, 68-74 (2015).
- 812 8 Kothapalli, K. S. *et al.* Positive Selection on a Regulatory Insertion-Deletion Polymorphism in  
813 FADS2 Influences Apparent Endogenous Synthesis of Arachidonic Acid. *Mol Biol Evol* **33**, 1726-  
814 1739 (2016).
- 815 9 Fumagalli, M. *et al.* Greenlandic Inuit show genetic signatures of diet and climate adaptation.  
816 *Science* **349**, 1343-1347 (2015).
- 817 10 Reardon, H. T. *et al.* Insertion-deletions in a FADS2 intron 1 conserved regulatory locus control  
818 expression of fatty acid desaturases 1 and 2 and modulate response to simvastatin.  
819 *Prostaglandins Leukot Essent Fatty Acids* **87**, 25-33 (2012).
- 820 11 Mathieson, I. *et al.* Genome-wide patterns of selection in 230 ancient Eurasians. *Nature* **528**,  
821 499-503 (2015).
- 822 12 Bar-Yosef, O. in *On Human Nature: Biology, Psychology, Ethics, Politics, and Religion* (eds M.  
823 Tibayrenc & F. J. Ayala) Ch. 19, 297-331 (Academic Press, 2017).
- 824 13 Coward, F., Shennan, S., Colledge, S., Conolly, J. & Collard, M. The spread of Neolithic plant  
825 economies from the Near East to northwest Europe: a phylogenetic analysis. *Journal of*  
826 *Archaeological Science* **35**, 42-56 (2008).
- 827 14 Bogaard, A. *et al.* Crop manuring and intensive land management by Europe's first farmers. *Proc*  
828 *Natl Acad Sci U S A* **110**, 12589-12594 (2013).
- 829 15 Richards, M. P. in *The Evolution of Hominin Diets: Integrating Approaches to the Study of*  
830 *Palaeolithic Subsistence* (eds J. J. Hublin & M. P. Richards) 251-257 (Springer Science; Business  
831 Media, 2009).
- 832 16 Richards, M. P., Schulting, R. J. & Hedges, R. E. Archaeology: sharp shift in diet at onset of  
833 Neolithic. *Nature* **425**, 366 (2003).
- 834 17 Richards, M. P., Price, T. D. & Koch, E. Mesolithic and Neolithic Subsistence in Denmark: New  
835 Stable Isotope Data. *Current Anthropology* **44**, 288-295 (2003).
- 836 18 Fraser, R. A., Bogaard, A., Schäfer, M., Arbogast, R. & Heaton, T. H. E. Integrating botanical,  
837 faunal and human stable carbon and nitrogen isotope values to reconstruct land use and  
838 palaeodiet at LBK Vaihingen an der Enz, Baden-Württemberg. *World Archaeology* **45**, 492-517  
839 (2013).
- 840 19 Knipper, C. *et al.* What is on the menu in a Celtic town? Iron Age diet reconstructed at Basel-  
841 Gasfabrik, Switzerland. *Archaeological and Anthropological Sciences* (2016).

- 842 20 López-Costas, O., Müldner, G. & Martínez Cortizas, A. Diet and lifestyle in Bronze Age Northwest  
843 Spain: the collective burial of Cova do Santo. *Journal of Archaeological Science* **55**, 209-218  
844 (2015).
- 845 21 Haak, W. *et al.* Massive migration from the steppe was a source for Indo-European languages in  
846 Europe. *Nature* **522**, 207-211 (2015).
- 847 22 Lazaridis, I. *et al.* Ancient human genomes suggest three ancestral populations for present-day  
848 Europeans. *Nature* **513**, 409-413 (2014).
- 849 23 Patterson, N. *et al.* Ancient admixture in human history. *Genetics* **192**, 1065-1093 (2012).
- 850 24 Voight, B. F., Kudravalli, S., Wen, X. & Pritchard, J. K. A map of recent positive selection in the  
851 human genome. *PLoS Biol* **4**, e72 (2006).
- 852 25 Ferrer-Admetlla, A., Liang, M., Korneliussen, T. & Nielsen, R. On detecting incomplete soft or  
853 hard selective sweeps using haplotype structure. *Mol Biol Evol* **31**, 1275-1291 (2014).
- 854 26 Fay, J. C. & Wu, C. I. Hitchhiking under positive Darwinian selection. *Genetics* **155**, 1405-1413  
855 (2000).
- 856 27 Fu, Q. *et al.* The genetic history of Ice Age Europe. *Nature* **534**, 200-205 (2016).
- 857 28 Schraiber, J. G., Evans, S. N. & Slatkin, M. Bayesian Inference of Natural Selection from Allele  
858 Frequency Time Series. *Genetics* **203**, 493-511 (2016).
- 859 29 Gazave, E. *et al.* Neutral genomic regions refine models of recent rapid human population  
860 growth. *Proc Natl Acad Sci U S A* **111**, 757-762 (2014).
- 861 30 Prüfer, K. *et al.* The complete genome sequence of a Neanderthal from the Altai Mountains.  
862 *Nature* **505**, 43-49 (2014).
- 863 31 Meyer, M. *et al.* A high-coverage genome sequence from an archaic Denisovan individual.  
864 *Science* **338**, 222-226 (2012).
- 865 32 Fu, Q. *et al.* Genome sequence of a 45,000-year-old modern human from western Siberia.  
866 *Nature* **514**, 445-449 (2014).
- 867 33 Rasmussen, M. *et al.* The genome of a Late Pleistocene human from a Clovis burial site in  
868 western Montana. *Nature* **506**, 225-229 (2014).
- 869 34 Rasmussen, M. *et al.* The ancestry and affiliations of Kennewick Man. *Nature* **523**, 455-458  
870 (2015).
- 871 35 Lazaridis, I. *et al.* Genomic insights into the origin of farming in the ancient Near East. *Nature*  
872 **536**, 419-424 (2016).
- 873 36 Tishkoff, S. A. & Verrelli, B. C. Patterns of human genetic diversity: implications for human  
874 evolutionary history and disease. *Annu Rev Genomics Hum Genet* **4**, 293-340 (2003).
- 875 37 Fu, W. & Akey, J. M. Selection and adaptation in the human genome. *Annu Rev Genomics Hum*  
876 *Genet* **14**, 467-489 (2013).
- 877 38 GTEx Consortium. The Genotype-Tissue Expression (GTEx) pilot analysis: multitissue gene  
878 regulation in humans. *Science* **348**, 648-660 (2015).
- 879 39 Welter, D. *et al.* The NHGRI GWAS Catalog, a curated resource of SNP-trait associations. *Nucleic*  
880 *Acids Res* **42**, D1001-1006 (2014).
- 881 40 Guan, W. *et al.* Genome-wide association study of plasma N6 polyunsaturated fatty acids within  
882 the cohorts for heart and aging research in genomic epidemiology consortium. *Circ Cardiovasc*  
883 *Genet* **7**, 321-331 (2014).
- 884 41 Dorajoo, R. *et al.* A genome-wide association study of n-3 and n-6 plasma fatty acids in a  
885 Singaporean Chinese population. *Genes Nutr* **10**, 53 (2015).
- 886 42 Shin, S. Y. *et al.* An atlas of genetic influences on human blood metabolites. *Nat Genet* **46**, 543-  
887 550 (2014).

- 888 43 Tintle, N. L. *et al.* A genome-wide association study of saturated, mono- and polyunsaturated  
889 red blood cell fatty acids in the Framingham Heart Offspring Study. *Prostaglandins Leukot Essent*  
890 *Fatty Acids* **94**, 65-72 (2015).
- 891 44 Xie, W. *et al.* Genetic variants associated with glycine metabolism and their role in insulin  
892 sensitivity and type 2 diabetes. *Diabetes* **62**, 2141-2150 (2013).
- 893 45 Lemaitre, R. N. *et al.* Genetic loci associated with plasma phospholipid n-3 fatty acids: a meta-  
894 analysis of genome-wide association studies from the CHARGE Consortium. *PLoS Genet* **7**,  
895 e1002193 (2011).
- 896 46 Gieger, C. *et al.* Genetics meets metabolomics: a genome-wide association study of metabolite  
897 profiles in human serum. *PLoS Genet* **4**, e1000282 (2008).
- 898 47 Kettunen, J. *et al.* Genome-wide association study identifies multiple loci influencing human  
899 serum metabolite levels. *Nat Genet* **44**, 269-276 (2012).
- 900 48 Mozaffarian, D. *et al.* Genetic loci associated with circulating phospholipid trans fatty acids: a  
901 meta-analysis of genome-wide association studies from the CHARGE Consortium. *Am J Clin Nutr*  
902 **101**, 398-406 (2015).
- 903 49 Eijgelsheim, M. *et al.* Genome-wide association analysis identifies multiple loci related to resting  
904 heart rate. *Hum Mol Genet* **19**, 3885-3894 (2010).
- 905 50 den Hoed, M. *et al.* Identification of heart rate-associated loci and their effects on cardiac  
906 conduction and rhythm disorders. *Nat Genet* **45**, 621-631 (2013).
- 907 51 Global Lipids Genetics Consortium *et al.* Discovery and refinement of loci associated with lipid  
908 levels. *Nat Genet* **45**, 1274-1283 (2013).
- 909 52 Teslovich, T. M. *et al.* Biological, clinical and population relevance of 95 loci for blood lipids.  
910 *Nature* **466**, 707-713 (2010).
- 911 53 Aulchenko, Y. S. *et al.* Loci influencing lipid levels and coronary heart disease risk in 16 European  
912 population cohorts. *Nat Genet* **41**, 47-55 (2009).
- 913 54 Zabaneh, D. & Balding, D. J. A genome-wide association study of the metabolic syndrome in  
914 Indian Asian men. *PLoS One* **5**, e11961 (2010).
- 915 55 Kathiresan, S. *et al.* Common variants at 30 loci contribute to polygenic dyslipidemia. *Nat Genet*  
916 **41**, 56-65 (2009).
- 917 56 Waterworth, D. M. *et al.* Genetic variants influencing circulating lipid levels and risk of coronary  
918 artery disease. *Arterioscler Thromb Vasc Biol* **30**, 2264-2276 (2010).
- 919 57 Sabatti, C. *et al.* Genome-wide association analysis of metabolic traits in a birth cohort from a  
920 founder population. *Nat Genet* **41**, 35-46 (2009).
- 921 58 Franke, A. *et al.* Genome-wide meta-analysis increases to 71 the number of confirmed Crohn's  
922 disease susceptibility loci. *Nat Genet* **42**, 1118-1125 (2010).
- 923 59 Liu, J. Z. *et al.* Association analyses identify 38 susceptibility loci for inflammatory bowel disease  
924 and highlight shared genetic risk across populations. *Nat Genet* **47**, 979-986 (2015).
- 925 60 Jostins, L. *et al.* Host-microbe interactions have shaped the genetic architecture of inflammatory  
926 bowel disease. *Nature* **491**, 119-124 (2012).
- 927 61 Richards, M. P., Jacobi, R., Cook, J., Pettitt, P. B. & Stringer, C. B. Isotope evidence for the  
928 intensive use of marine foods by Late Upper Palaeolithic humans. *J Hum Evol* **49**, 390-394  
929 (2005).
- 930 62 Richards, M. P. & Hedges, R. E. M. Stable Isotope Evidence for Similarities in the Types of Marine  
931 Foods Used by Late Mesolithic Humans at Sites Along the Atlantic Coast of Europe. *Journal of*  
932 *Archaeological Science* **26**, 717-722 (1999).
- 933 63 Lubell, D., Jackes, M., Schwarcz, H. & Knyf, M. The Mesolithic-Neolithic Transition in  
934 Portugal: Isotopic and Dental Evidence of Diet. *Journal of Archaeological Science* **21**, 201-216  
935 (1994).

- 936 64 Richards, M. P. & Mellars, P. A. Stable isotopes and the seasonality of the Ornsay middens.  
937 *Antiquity* **72**, 178-184 (1998).
- 938 65 Bonsall, C. *et al.* Mesolithic and Early Neolithic in the Iron Gates: A Palaeodietary Perspective.  
939 *Journal of European Archaeology* **5**, 50-92 (1997).
- 940 66 Abedi, E. & Sahari, M. A. Long-chain polyunsaturated fatty acid sources and evaluation of their  
941 nutritional and functional properties. *Food Sci Nutr* **2**, 443-463 (2014).
- 942 67 Simopoulos, A. P. Evolutionary aspects of diet: the omega-6/omega-3 ratio and the brain. *Mol*  
943 *Neurobiol* **44**, 203-215 (2011).
- 944 68 Mannino, M. A., Thomas, K. D., Leng, M. J., Di Salvo, R. & Richards, M. P. Stuck to the shore?  
945 Investigating prehistoric hunter-gatherer subsistence, mobility and territoriality in a  
946 Mediterranean coastal landscape through isotope analyses on marine mollusc shell carbonates  
947 and human bone collagen. *Quaternary International* **244**, 88-104 (2011).
- 948 69 Mannino, M. A. *et al.* Origin and diet of the prehistoric hunter-gatherers on the mediterranean  
949 island of Favignana (Egadi Islands, Sicily). *PLoS One* **7**, e49802 (2012).
- 950 70 Lightfoot, E., Boneva, B., Miracle, P. T., Šlaus, M. & O'Connell, T. C. Exploring the Mesolithic and  
951 Neolithic transition in Croatia through isotopic investigations. *Antiquity* **85**, 73-86 (2015).
- 952 71 Bocquet-Appel, J.-P., Naji, S., Vander Linden, M. & Kozłowski, J. Understanding the rates of  
953 expansion of the farming system in Europe. *Journal of Archaeological Science* **39**, 531-546  
954 (2012).
- 955 72 Rowley-Conwy, P. Westward Ho! The Spread of Agriculture from Central Europe to the Atlantic.  
956 *Current Anthropology* **52**, S431-S451 (2011).
- 957 73 Vigne, J.-D. in *The Neolithic Demographic Transition and its Consequences* (eds J.-P. Bocquet-  
958 Appel & O. Bar-Yosef) 179-205 (Springer Science+Business Media B.V., 2008).
- 959 74 Cramp, L. J. *et al.* Immediate replacement of fishing with dairying by the earliest farmers of the  
960 Northeast Atlantic archipelagos. *Proc Biol Sci* **281**, 20132372 (2014).
- 961 75 Curry, A. Archaeology: The milk revolution. *Nature* **500**, 20-22 (2013).
- 962 76 Salque, M. *et al.* Earliest evidence for cheese making in the sixth millennium BC in northern  
963 Europe. *Nature* **493**, 522-525 (2013).
- 964 77 Lidén, K., Eriksson, G., Nordqvist, B., Götherström, A. & Bendixen, E. "The wet and the wild  
965 followed by the dry and the tame" – or did they occur at the same time? Diet in Mesolithic –  
966 Neolithic southern Sweden. *Antiquity* **78**, 23-33 (2004).
- 967 78 Rottoli, M. & Castiglioni, E. Prehistory of plant growing and collecting in northern Italy, based on  
968 seed remains from the early Neolithic to the Chalcolithic (c. 5600–2100 cal b.c.). *Vegetation*  
969 *History and Archaeobotany* **18**, 91-103 (2008).
- 970 79 Cho, H. P., Nakamura, M. & Clarke, S. D. Cloning, expression, and fatty acid regulation of the  
971 human delta-5 desaturase. *J Biol Chem* **274**, 37335-37339 (1999).
- 972 80 Cho, H. P., Nakamura, M. T. & Clarke, S. D. Cloning, expression, and nutritional regulation of the  
973 mammalian Delta-6 desaturase. *J Biol Chem* **274**, 471-477 (1999).
- 974 81 Rapoport, S. I., Igarashi, M. & Gao, F. Quantitative contributions of diet and liver synthesis to  
975 docosahexaenoic acid homeostasis. *Prostaglandins Leukot Essent Fatty Acids* **82**, 273-276  
976 (2010).
- 977 82 DeMar, J. C., Jr., Ma, K., Chang, L., Bell, J. M. & Rapoport, S. I. alpha-Linolenic acid does not  
978 contribute appreciably to docosahexaenoic acid within brain phospholipids of adult rats fed a  
979 diet enriched in docosahexaenoic acid. *J Neurochem* **94**, 1063-1076 (2005).
- 980 83 DeMar, J. C., Jr. *et al.* Brain elongation of linoleic acid is a negligible source of the arachidonate  
981 in brain phospholipids of adult rats. *Biochim Biophys Acta* **1761**, 1050-1059 (2006).
- 982 84 Qin, X. *et al.* Brown but not white adipose cells synthesize omega-3 docosahexaenoic acid in  
983 culture. *Prostaglandins Leukot Essent Fatty Acids* **104**, 19-24 (2016).



- 984 85 Okada, Y. *et al.* Genetics of rheumatoid arthritis contributes to biology and drug discovery.  
985 *Nature* **506**, 376-381 (2014).
- 986 86 Zhang, B. *et al.* Large-scale genetic study in East Asians identifies six new loci associated with  
987 colorectal cancer risk. *Nat Genet* **46**, 533-542 (2014).
- 988 87 Allentoft, M. E. *et al.* Population genomics of Bronze Age Eurasia. *Nature* **522**, 167-172 (2015).
- 989 88 Gamba, C. *et al.* Genome flux and stasis in a five millennium transect of European prehistory.  
990 *Nat Commun* **5**, 5257 (2014).
- 991 89 Olalde, I. *et al.* Derived immune and ancestral pigmentation alleles in a 7,000-year-old  
992 Mesolithic European. *Nature* **507**, 225-228 (2014).
- 993 90 Raghavan, M. *et al.* Upper Palaeolithic Siberian genome reveals dual ancestry of Native  
994 Americans. *Nature* **505**, 87-91 (2014).
- 995 91 Jones, E. R. *et al.* Upper Palaeolithic genomes reveal deep roots of modern Eurasians. *Nat*  
996 *Commun* **6**, 8912 (2015).
- 997 92 Fu, Q. *et al.* An early modern human from Romania with a recent Neanderthal ancestor. *Nature*  
998 **524**, 216-219 (2015).
- 999 93 Seguin-Orlando, A. *et al.* Paleogenomics. Genomic structure in Europeans dating back at least  
1000 36,200 years. *Science* **346**, 1113-1118 (2014).
- 1001 94 Gunther, T. *et al.* Ancient genomes link early farmers from Atapuerca in Spain to modern-day  
1002 Basques. *Proc Natl Acad Sci U S A* **112**, 11917-11922 (2015).
- 1003 95 Olalde, I. *et al.* A Common Genetic Origin for Early Farmers from Mediterranean Cardial and  
1004 Central European LBK Cultures. *Mol Biol Evol* **32**, 3132-3142 (2015).
- 1005 96 Gallego Llorente, M. *et al.* Ancient Ethiopian genome reveals extensive Eurasian admixture  
1006 throughout the African continent. *Science* **350**, 820-822 (2015).
- 1007 97 Li, J. Z. *et al.* Worldwide human relationships inferred from genome-wide patterns of variation.  
1008 *Science* **319**, 1100-1104 (2008).
- 1009 98 Novembre, J. *et al.* Genes mirror geography within Europe. *Nature* **456**, 98-101 (2008).
- 1010 99 The UK10 Consortium *et al.* The UK10K project identifies rare variants in health and disease.  
1011 *Nature* **526**, 82-90 (2015).
- 1012 100 Browning, B. L. & Browning, S. R. Genotype Imputation with Millions of Reference Samples. *Am J*  
1013 *Hum Genet* **98**, 116-126 (2016).
- 1014 101 Barrett, J. C., Fry, B., Maller, J. & Daly, M. J. Haploview: analysis and visualization of LD and  
1015 haplotype maps. *Bioinformatics* **21**, 263-265 (2005).
- 1016 102 Paradis, E. pegas: an R package for population genetics with an integrated-modular approach.  
1017 *Bioinformatics* **26**, 419-420 (2010).
- 1018 103 Dannemann, M., Andres, A. M. & Kelso, J. Introgression of Neandertal- and Denisovan-like  
1019 Haplotypes Contributes to Adaptive Variation in Human Toll-like Receptors. *Am J Hum Genet* **98**,  
1020 22-33 (2016).
- 1021 104 Plummer, M., Best, N., Cowles, K. & Vines, K. CODA: convergence diagnosis and output analysis  
1022 for MCMC. *R News* **6**, 7-11 (2006).
- 1023 105 Tajima, F. Statistical method for testing the neutral mutation hypothesis by DNA polymorphism.  
1024 *Genetics* **123**, 585-595 (1989).
- 1025 106 Szpiech, Z. A. & Hernandez, R. D. selscan: an efficient multithreaded program to perform EHH-  
1026 based scans for positive selection. *Mol Biol Evol* **31**, 2824-2827 (2014).
- 1027 107 Gautier, M. & Vitalis, R. rehh: an R package to detect footprints of selection in genome-wide SNP  
1028 data from haplotype structure. *Bioinformatics* **28**, 1176-1177 (2012).
- 1029 108 Price, A. L. *et al.* Principal components analysis corrects for stratification in genome-wide  
1030 association studies. *Nat Genet* **38**, 904-909 (2006).

1031 109 Wang, J. *et al.* Factorbook.org: a Wiki-based database for transcription factor-binding data  
1032 generated by the ENCODE consortium. *Nucleic Acids Res* **41**, D171-176 (2013).

### 1033 **Acknowledgements**

1034 We thank Montgomery Slatkin and Joshua Schraiber for their help in running their software,  
1035 David Reich and Iain Mathieson for making their data publicly available, Leonardo Arbiza,  
1036 Charles Liang, Daniel (Alex) Marburgh, Kumar Kothapalli, Tom Brenna, and all members of the  
1037 Keinan lab for helpful discussion and comments on the manuscript. This work was supported by  
1038 the National Institutes of Health (Grants R01HG006849 and R01GM108805 to AK) and the  
1039 Edward Mallinckrodt, Jr. Foundation (AK).

### 1040 **Author contributions**

1041 K.Y. and A.K. conceived and designed the project. K.Y. performed the vast majority of data  
1042 analysis with help from F.G. and D.W.. K.Y. and A.K. interpreted the results, with contribution  
1043 from O.B.Y. in interpretation from an anthropological perspective. K.Y. and A.K. wrote the  
1044 manuscript. All authors read, edited and approved the final version of the manuscript.

### 1045 **Competing interests**

1046 The authors declare no competing interests.

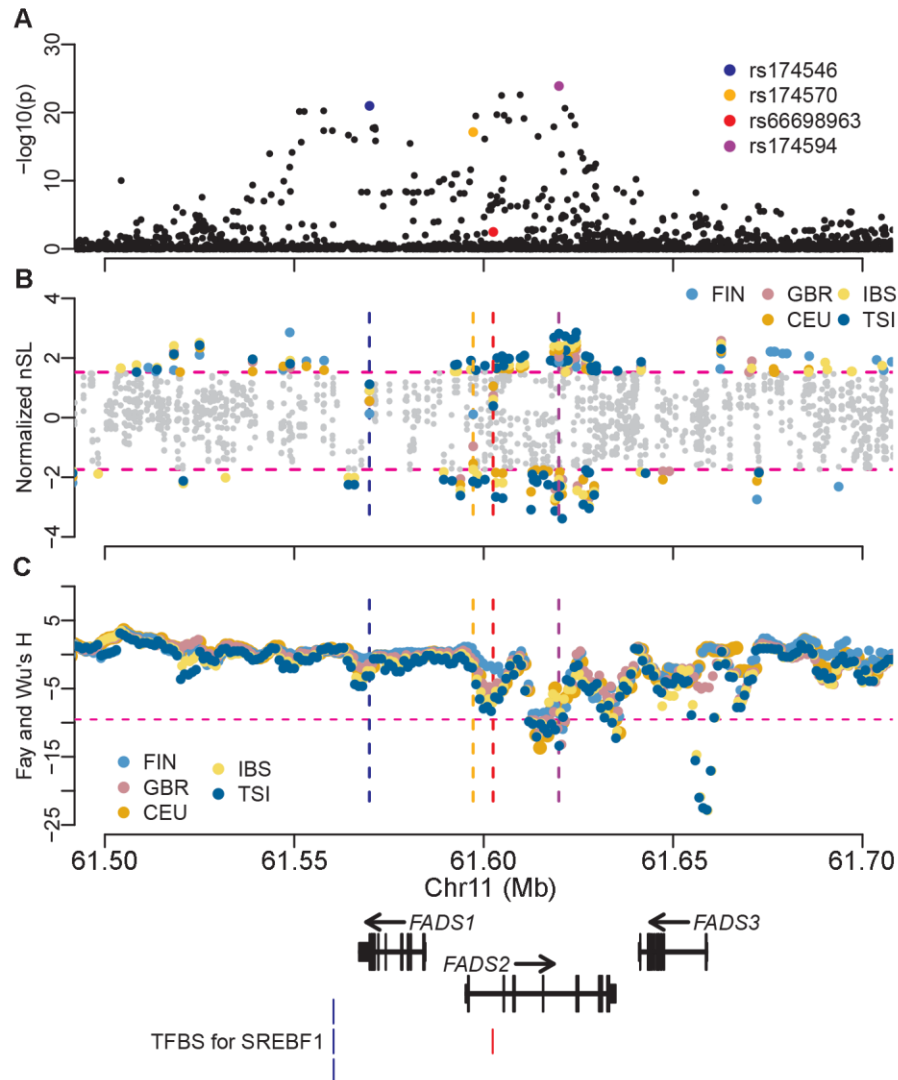

1047

1048 **Fig. 1. Recent positive selection on the *FADS* locus in Europeans.** (A) Ancient DNA-based  
1049 selection test. The overall pattern is consistent with that previously described<sup>11</sup> (Supplementary  
1050 Fig. S27). Four variants are highlighted: the most significant SNP (purple); the top SNP reported  
1051 by Mathieson *et al.*<sup>11</sup> (blue); one of the top adaptive SNPs reported in Greenlandic Inuit<sup>9</sup>  
1052 (orange); the indel reported to be targeted by positive selection in populations with historical  
1053 plant-based diets<sup>8</sup> (red). (B) Haplotype-based selection test (nSL<sup>25</sup>) in modern Europeans. Tests  
1054 were performed separately for each of the five 1000GP European groups. Only variants with  
1055 significant values, beyond the 5% genome-wide significance cutoff (magenta dashed lines) are  
1056 shown with population-specific colors, with exceptions for the four highlighted variants  
1057 (positions indicated with vertical dashed lines, colored as in A). Consistent patterns were  
1058 detected with iHS (Supplementary Fig. 4) and in UK10K cohorts (Supplementary Fig. 6). (C)  
1059 Site frequency spectrum (SFS)-based selection test (Fay and Wu's H<sup>26</sup>) in modern Europeans.  
1060 Tests were performed separately for each of the five 1000GP European groups. Positions for the  
1061 four highlighted variants are indicated as in (B). The additional significant result observed  
1062 around the transcription starting site of *FADS3* is beyond the scope of this paper, and detailed

1063 results will be published separately (Ye, Keinan *et al.*). Similar patterns were observed in  
1064 UK10K cohorts (Supplementary Fig. 8). At the bottom are the representative transcript models  
1065 for the three *FADS* genes and the four transcription factor binding sites (TFBS) for SREBF1  
1066 from generated from ENCODE<sup>109</sup> (blue) and another previous study<sup>10</sup> (red). The 5% significance  
1067 cutoffs in (B) and (C) are the most extreme ones among the five populations (but *p* values  
1068 reported in the main text were based on population-specific empirical distributions). The five  
1069 1000 GP European populations are: CEU – Utah Residents (CEPH) with Northern and Western  
1070 Ancestry; FIN – Finnish in Finland; GRB – British in England and Scotland; IBS – Iberian  
1071 Population in Spain; TSI – Toscani in Italia.

1072

1073



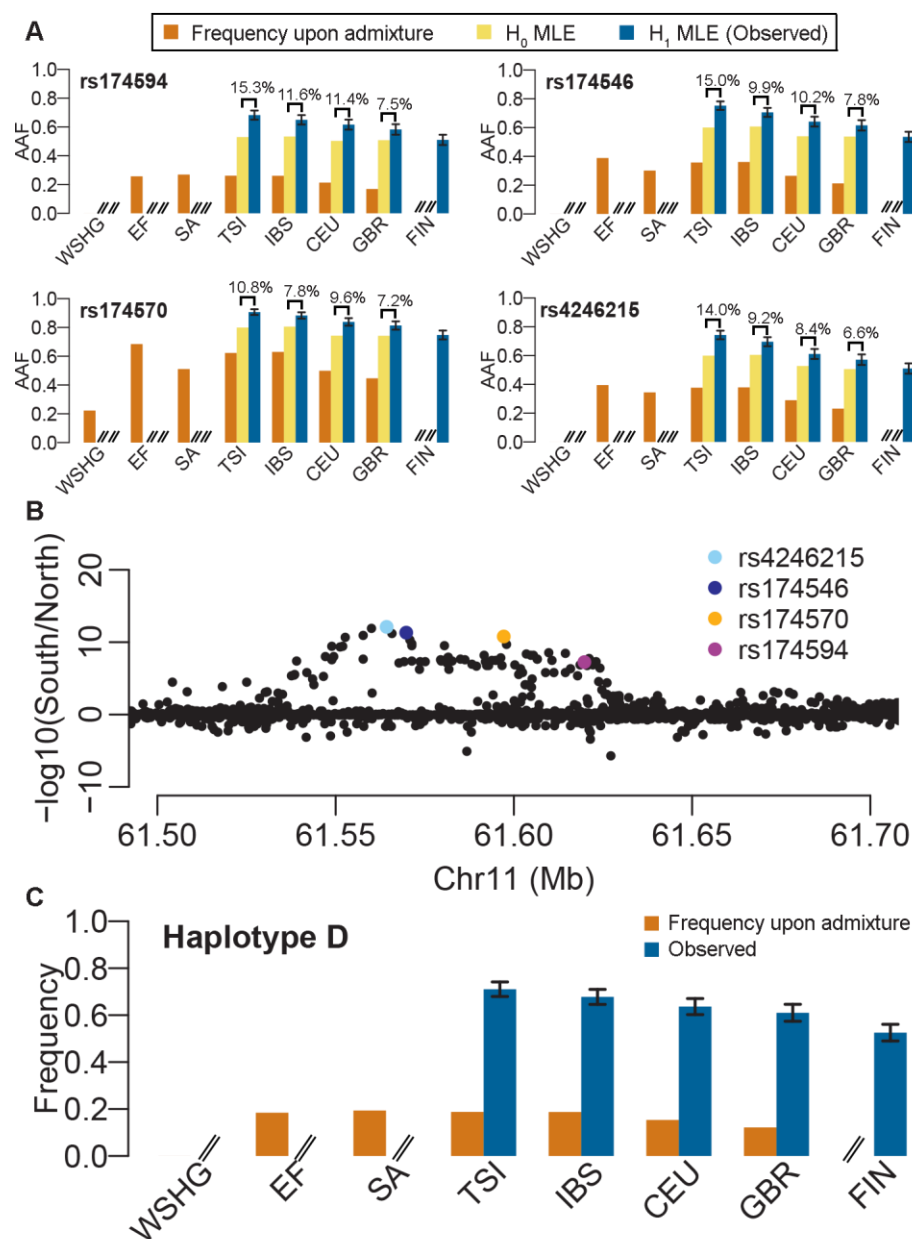

1074

1075 **Fig. 2. Varying selection and frequency patterns between Southern and Northern Europe.**

1076 (A) South-North frequency gradient for adaptive alleles of four representative SNPs under  
 1077 different scenarios. AAF refers to adaptive allele frequency. Orange bars represent frequencies  
 1078 upon admixture, which were directly observed in ancient groups and predicted for extant  
 1079 populations based on linear mixture of frequencies in ancient groups. Yellow bars represent  
 1080 frequencies estimated under the null hypothesis. Estimates for ancient groups were not shown  
 1081 because they are not relevant here. Blue bars represent frequencies estimated under the  
 1082 alternative hypothesis, whose only constraint is the observed data and therefore the MLEs are  
 1083 just the observed means. The estimates for ancient groups are the same as their frequencies upon  
 1084 admixture and are omitted on the plot. The absolute difference between  $H_0$  and  $H_1$  estimates are  
 1085 indicated above the corresponding bars. Please note that the frequencies upon admixture in

1086 WSHG are 0 for rs174594, rs174546 and rs4246215 and no bars were plotted. **(B)** Comparison  
1087 of aDNA-based selection signals between Southern and Northern Europe. aDNA-based selection  
1088 tests were performed separately for Southern (TSI and IBS) and Northern (CEU and GBR)  
1089 Europeans. For each variant, the  $p$  values from these two tests were compared at a  $-\log_{10}$  scale (y  
1090 axis). SNPs of interest were colored as indicated. **(C)** South-North frequency gradient for the  
1091 adaptive haplotype in extant populations. The adaptive haplotype is referred to as haplotype D.  
1092 The two frequency types are just as in (A). The frequency upon admixture for WSHG is 0. In (A)  
1093 and (C), FIN has only observed values. If values are not shown or not available, signs of “/” are  
1094 indicated at corresponding positions. Error bars stand for standard errors.

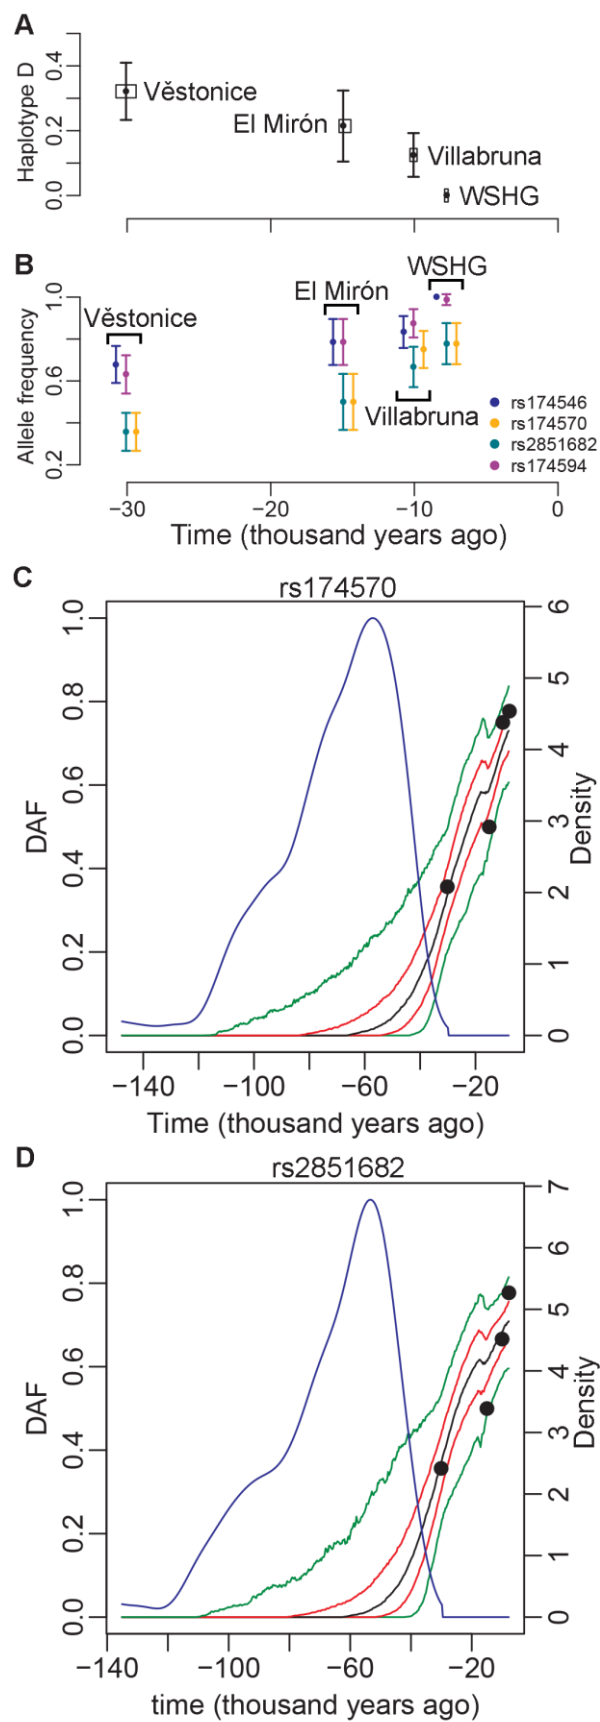

1096 **Fig. 3. Temporal frequency pattern and selection signals in pre-Neolithic European hunter-**  
1097 **gatherers. (A)** The frequency of haplotype D over time in four groups of hunter-gatherers.  
1098 Frequency for each group is plotted as a black point at the median age of samples. The horizontal  
1099 box surrounding the point represents the medians of lower- and upper-bound estimates of sample  
1100 ages. The error bar is standard error. Group names are indicated next to their frequencies. **(B)**  
1101 Allele frequencies for four SNPs. It has similar format as in (A) except that small arbitrary  
1102 values were added on their x coordinates in order to visualize all SNPs, which were colored as  
1103 indicated in the legend. The alleles chosen are the ones increasing over time. They are derived  
1104 alleles for rs174570 and rs2851682, and ancestral alleles for rs174546 and rs174594. **(C)** and **(D)**  
1105 Posterior distribution on the derived allele frequency path for rs174570 and rs2851682,  
1106 respectively. The sampled frequencies are indicated with black points, which are the same point  
1107 estimates as in (B). The median, 25% and 75% quantiles, and 5% and 95% quantiles of the  
1108 posterior distribution are indicated respectively with black, red and green lines. The posterior  
1109 distribution on the age of derived allele is shown with a blue line, with values on the right y axis.



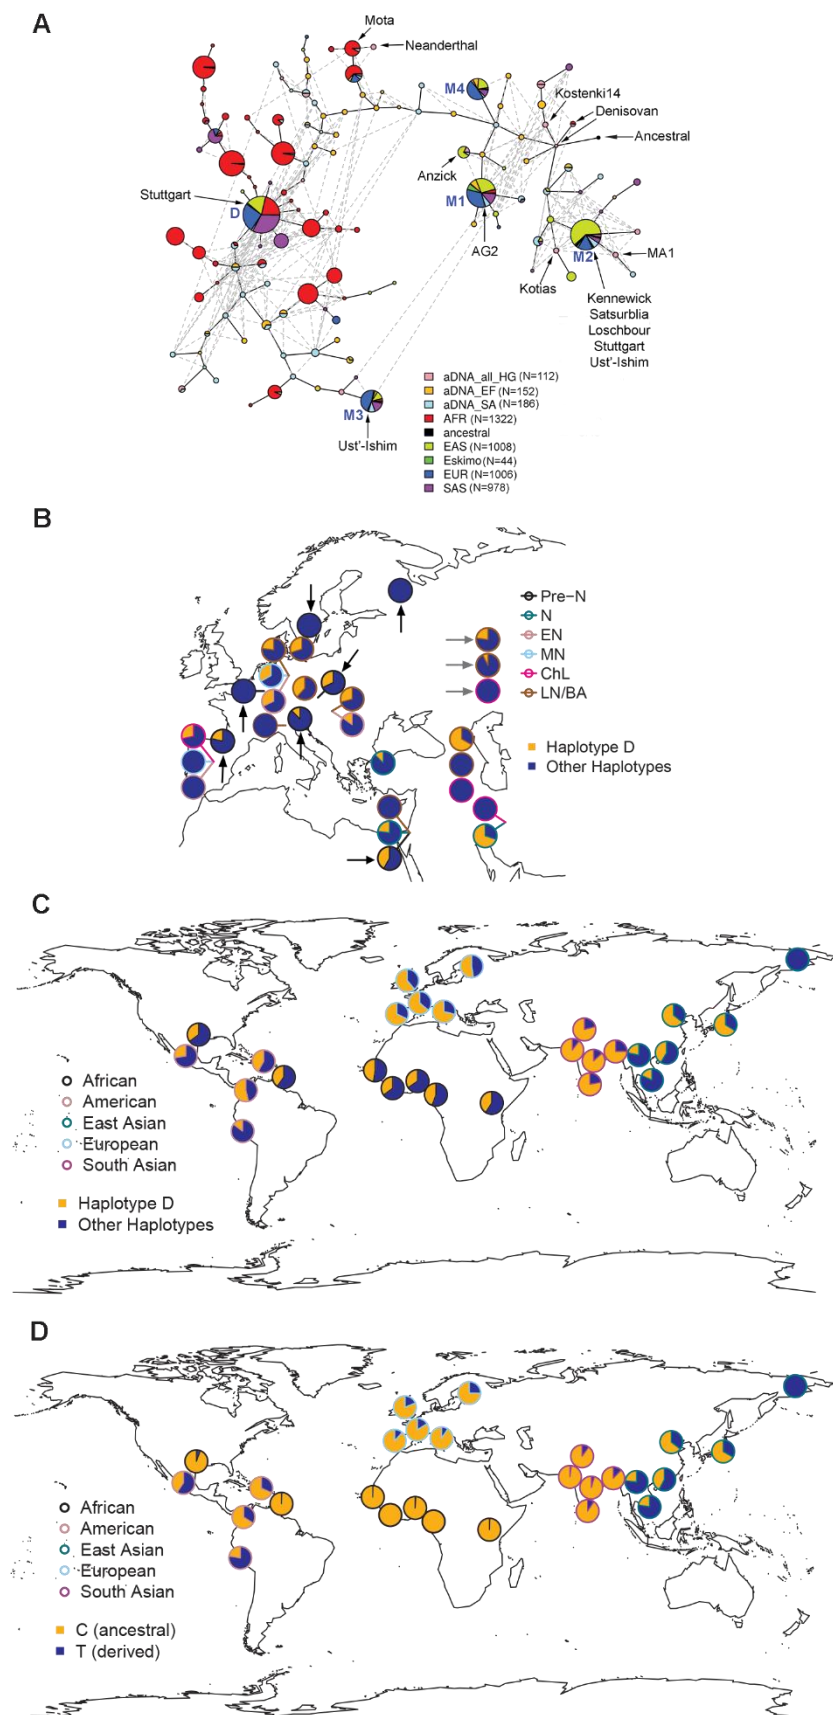

1111 **Fig. 4. Haplotype network and geographical frequency distribution.** (A) Haplotype network  
1112 for 1000G samples (2,157 individuals, excluding admixed American samples), 22 modern  
1113 Eskimos and 225 aDNAs. Haplotype are defined on the *FADS1-FADS2* LD block. Each pie chart  
1114 represents one unique haplotype and its size is proportional to  $\log_2(\# \text{ of chromosomes carrying}$   
1115  $\text{the haplotype})$  plus a minimum size so as to visualize the rare haplotypes. The sections in the pie  
1116 provide the breakdown of the haplotype representation amongst populations with population-  
1117 specific colors. Sample size for each group (# of haplotypes) is indicated in the legend. Because  
1118 of the small sample size of some groups, it can be difficult to visualize their proportions in this  
1119 plot. Detailed haplotype frequencies for each group could be found in Supplementary Table 2.  
1120 The edges connecting haplotypes are of arbitrary length. Haplotypes for some well-known  
1121 ancient samples are indicated with their names and arrows pointing at the corresponding pies.  
1122 The top five haplotypes in modern Europeans, referred to as D, M1, M2, M3, and M4 from the  
1123 most to least frequent common, are indicated with their names in blue font right next to the  
1124 haplotypes. (B) Frequency of haplotype D in Eurasian ancient DNAs. Each pie represents one  
1125 sampled group and is placed at the sampling location or nearby with a line pointing at the  
1126 sampling location. The color of the pie chart border and its associated line indicates the  
1127 archaeological period of the sample. If multiple samples of different periods were collected at the  
1128 same geographical location, these samples are ordered vertically with the older samples at the  
1129 bottom. Hunter-gatherer groups are indicated with black arrows and pastoralist groups with gray  
1130 arrows, while others are farmers. Geographical locations for some hunter-gatherer groups (e.g.  
1131 the Věstonice, El Mirón and Villabruna clusters) are only from representative samples. Detailed  
1132 frequencies could be found in Supplementary Table 3. Pre-N: Pre-Neolithic; N: Neolithic; EN:  
1133 Early Neolithic; MN: Mid-Neolithic; ChL: Chalcolithic; LN/BA: Late Neolithic/Bronze Age.  
1134 (C) Frequency of haplotype D in present-day global populations. Detailed frequencies are given  
1135 in Supplementary Table 4. (D) Frequency of SNP rs174570 in present-day global populations.  
1136 All 26 populations from 1000GP and one Eskimo group are included. The color of the pie chart  
1137 border represents the genetic ancestry. It is noteworthy that there are two samples in America  
1138 that are actually of African ancestry. Similar global patterns were observed with HGDP samples  
1139 (Supplementary Figs. 14 and 15).
